# Supplementary material for: One minute analysis of 200 histone posttranslational modifications by direct injection mass spectrometry
Source: PubMed Central journal article supplement — Genome Res. 2019 Jun;29(6):978–87. doi: 10.1101/gr.247353.118 (PMC6581051; doi:10.1101/gr.247353.118), 2019-06

# Supplemental figures

## One minute analysis of 200 histone post-translational modifications by direct injection mass spectrometry

Simone Sidoli<sup>1</sup>, Yekaterina Kori<sup>1,2</sup>, Mariana Lopes<sup>1,3</sup>, Zuo-Fei Yuan<sup>1</sup>, Hee Jong Kim<sup>1,2</sup>, Katarzyna Kulej<sup>1</sup>, Kevin A. Janssen<sup>1,2</sup>, Laura M. Agosto<sup>1,2</sup>, Julia Pinheiro Chagas da Cunha<sup>3</sup> and Benjamin A. Garcia<sup>1,2</sup>

<sup>1</sup>*Epigenetics Institute, Department of Biochemistry and Biophysics, Perelman School of Medicine, University of Pennsylvania, Philadelphia, PA, 19104, USA*

<sup>2</sup>*Biochemistry and Molecular Biophysics Graduate Group, Perelman School of Medicine, University of Pennsylvania, Philadelphia, PA, 19104, USA*

<sup>3</sup>*Laboratório Especial de Ciclo Celular, Center of Toxins, Immune Response and Cell Signaling - CeTICS, Instituto Butantan, São Paulo 05503-900, Brazil*

**Supplemental Figure 1:** Sample preparation and standard for DI-MS. (A) View of stage tips used for multi-channel sample preparation of histone samples. The tips contain a layer of Porous Graphitic Carbon (PGC, Hypercarb™, Thermo) and the plate holders are designed to allow collection of the eluate in 96-well plates. (B) View of the rotor used for drying 96-well plates (the centrifuge can work as SpeedVac), but also to perform stage tipping to up to 4 plates. (C) Chromatogram view of a DI-MS acquisition of digested BSA (1 µg/µl). The method is simple data-dependent acquisition (DDA) normally used for any proteomics experiment, programmed to perform a full MS scan (average 10 microscans) followed by an undefined number of MS/MS events. The longer the cycle the more the signals suitable to be selected for fragmentation. (D) Full MS scan of the BSA peptides detected by DI-MS using the DDA method. (E) Sequence coverage of the BSA using the described DDA method in DI-MS.

**A**

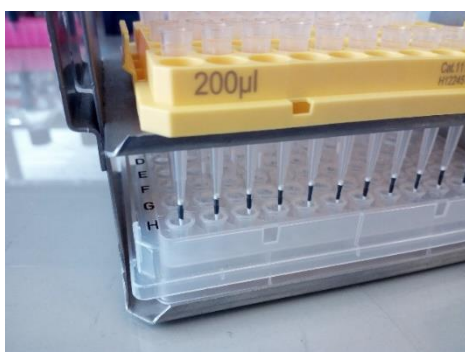

**B**

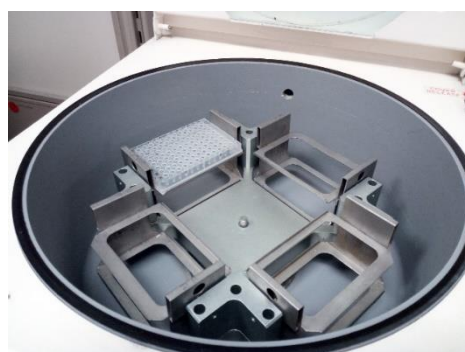

**C**

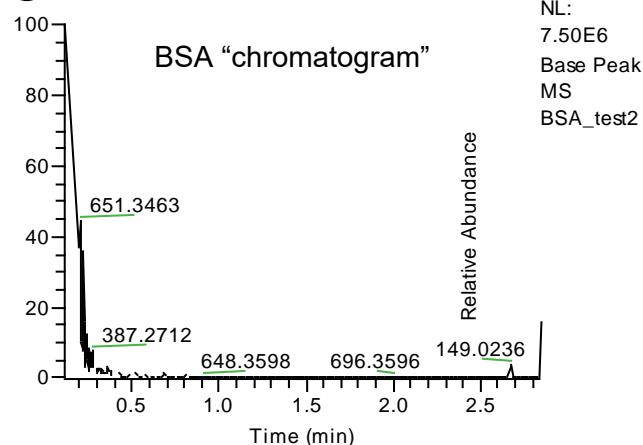

**D**

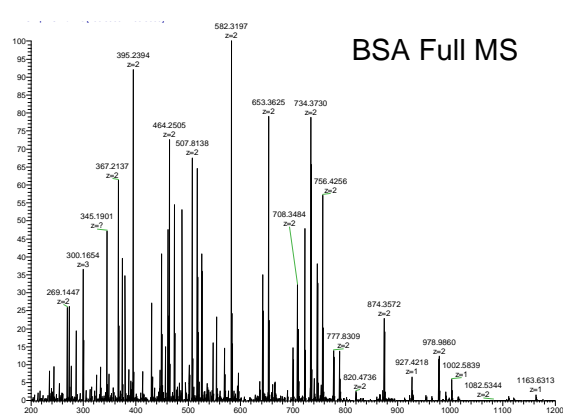

**E**

BSA sequence coverage (61%)

Signal peptide Propепptide Identified peptides

MKWVTFISLLLLFSSAYSRGVFRRDTHKSEIAHRFKDLGEEHFKGLVLIAFSQYLQQCPFDEHVKLVNELTEFAKTCVAD  
ESHAGCEKSLHTLFGDELCKVASLRETYGDMADCCCKEPERNECFLSHKDDSPDLPLKLPDPNTLCDEFKADEKFW  
GKLYEIAARRHPYFYAPELLYANKYNGVFQECQAEDKGACLLPKIETMREKVLASSARQRLRCASIQKFGERALKAW  
SVARLSQKFPKAEFVEVTKLVTDLTKVHKECCHGDLLCADDRADLAKYICDNQDTISSKLECCDKPLLEKSHCIAEVEK  
DAIPENLPPLTADFAEDKDVCKNYQEAKDAFLGSFLYEYSRRHPEYAVSVLLRLAKEYEATLEECCAKDDPHACYSTVF  
DKLKHLDVDEPNLIKQNCDFEKLGEYGFQNALIVRYTRKVPQVSTPLVEVSRSLGKVGTRCCTKPESEMPCTEDYDL  
SLILNRLCVLHEKTPVSEKVTKCCTESLVNRRPCFSALTPDETYVPAKFDEKLFTHADICTLPDTEKQIKKQTALVELLK  
HKPKATEEQKLTVMENFVAFVDKCCAADDKEACFAVEGPKLVVSTQTALA

**Supplemental Figure 2:** Estimation of injection reproducibility of the TriVersa NanoMate. (A) Screenshot of the electrospray current plot generated by the Advion software controlling the TriVersa NanoMate. The experiment is repetitive injections of the BSA; when the instrument switches on the voltage it is possible to observe a spike in the ion current, which is then stabilized at around 150 nA until the injection is completed. (B) Quantification of the selected peptide of histone H3 KSTGGKAPR (aa 9-17) modified with a trimethyl group on the lysine residue 9 (H3K9me3). The analysis corresponds to 104 samples ran as unassisted queue.

## A Multiple sample injections

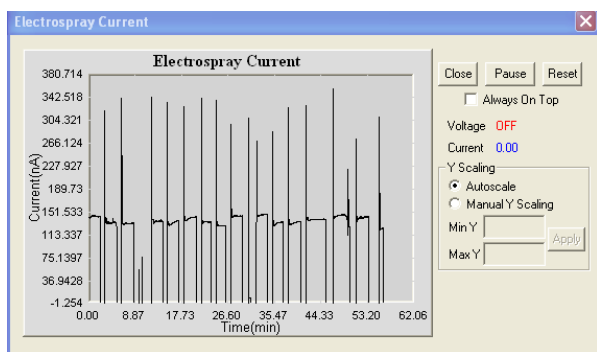

## B

Average: 10.24% - Stdev: 3.40% - Coefficient of variation: 33.16%

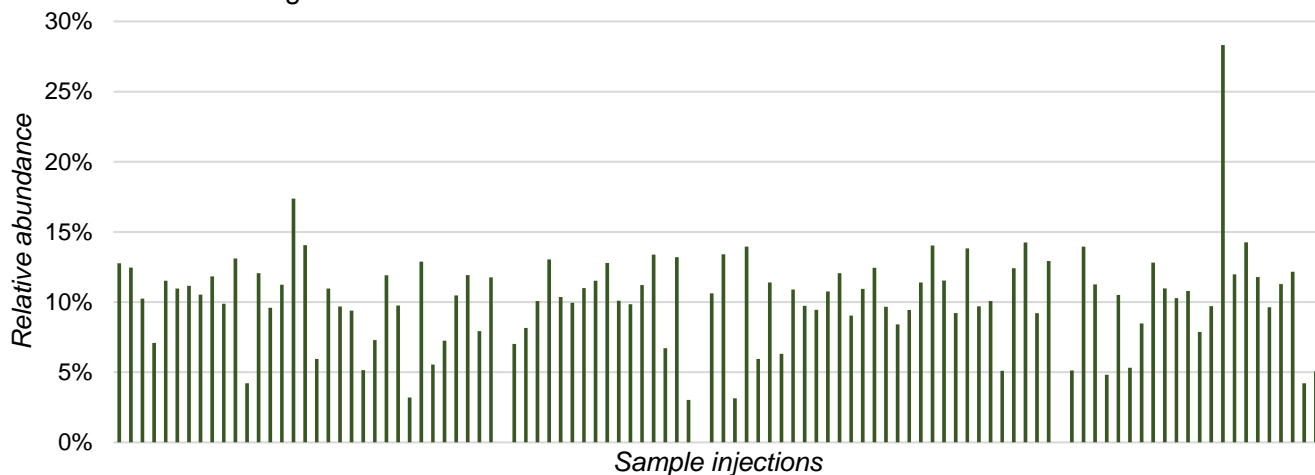

**Supplemental Figure 3: Reproducibility of DI-MS and LC-MS.** (A) Three injections of our custom synthetic peptide library acquired using DI-MS. (B) Overlay of the three spectra acquired using DI-MS. (C) Three injections of the library using LC-MS. (D) Overlay of the three chromatograms.

**A**

Direct injection

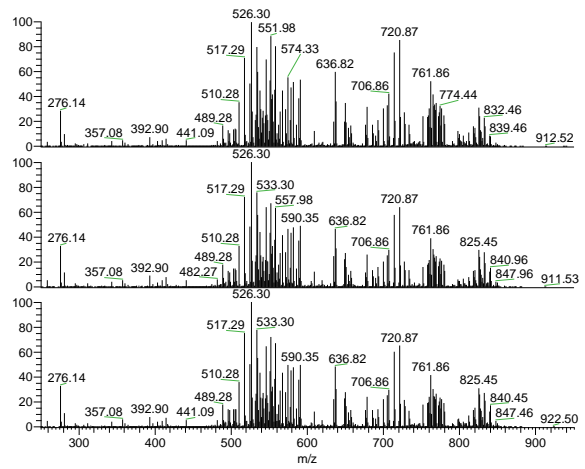

**B**

Direct injection  
Overlay of the 3 replicates

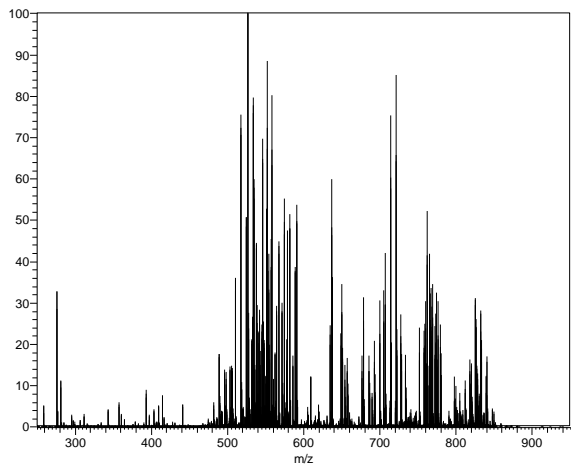

**C**

LC-MS

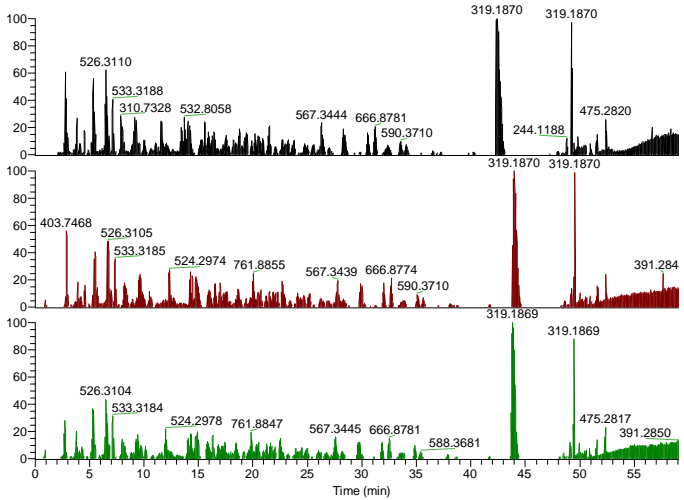

**D**

LC-MS  
Overlay of the 3 replicates

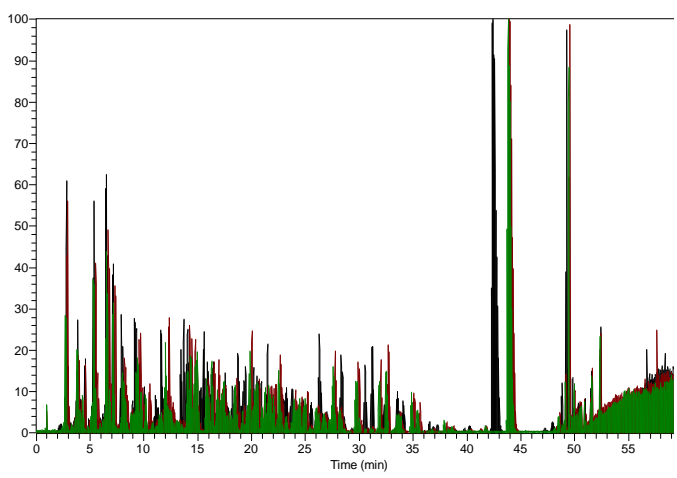

**Supplemental Figure 4:** MS/MS spectrum of the QC peptide. Manual annotation of fragment MS/MS ions obtained by HCD fragmentation of the intact QC peptide (underivatized and undigested). Only the theoretical masses labeled in the image were annotated, and only the singly charged ions.

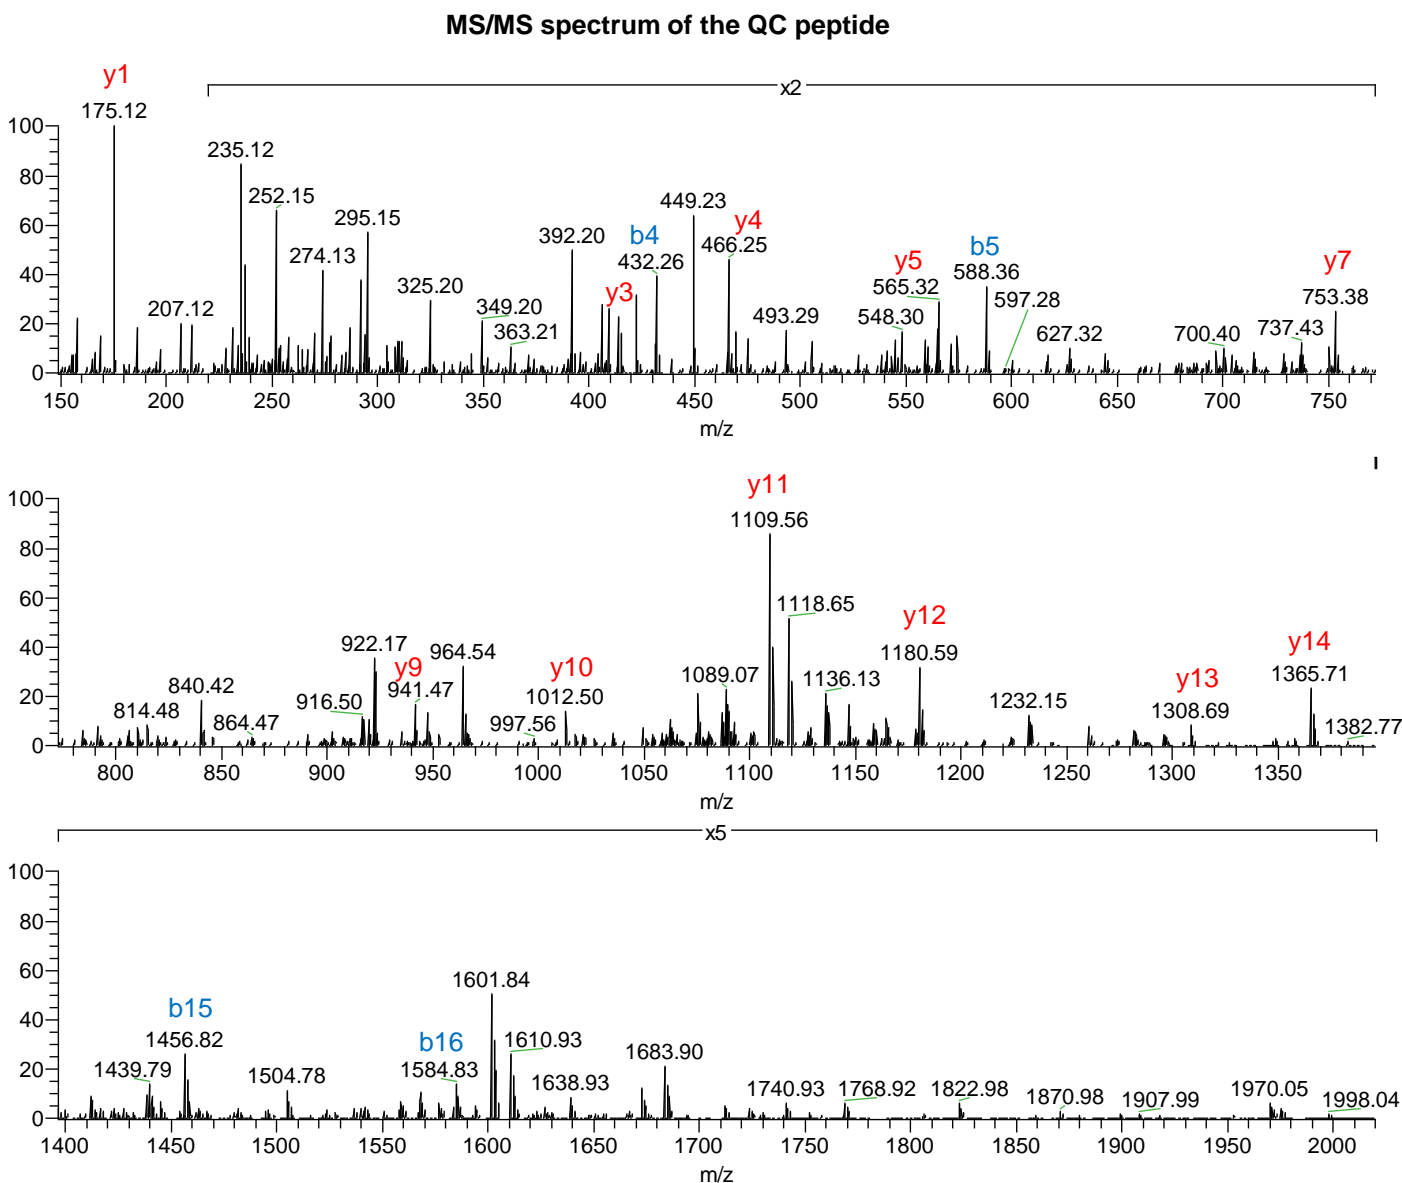

**Supplemental Figure 5:** Example of DI-MS acquisition of endogenous histone peptides. (A) Full MS window of the DI-MS scan event detecting the modified forms of the histone H3 peptide KSTGGKAPR (aa 9-17). The sample was prepared using peptide N-termini derivatization. (B) View of the same peptides acquired using LC-MS. (C) Example of the  $m/z$  values of the histone H3 peptide KSAPATGGVKKPHR (aa 27-40). The figure shows that multiple isobaric forms are present, requiring the discrimination of up to four different forms (example in red) with the same mass by MS/MS.

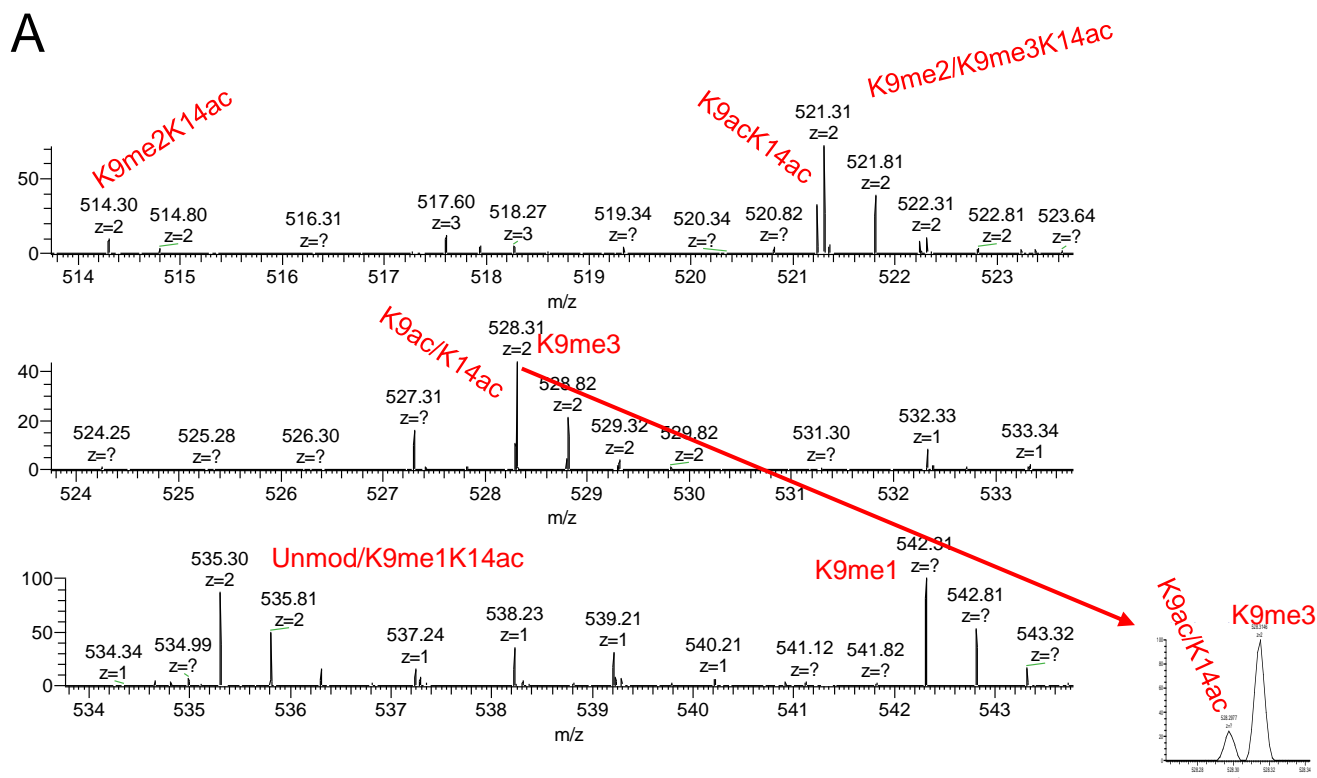

**Supplemental Figure 6: MS/MS of the histone H3 peptide aa 27-40 with three methyl groups. (A) MS/MS spectrum of the peptide derivatized using N-terminal propionylation. No useful b ions are present in the spectrum to discriminate the 4 isobaric forms. (B) Same peptide not derivatized at the N-termini. The ion b2 can be used to discriminate the relative abundance of the four isobaric species. (C) Theoretical fragment ions (only b series) of the four isobaric forms not derivatized with propionylation at the N-termini.**

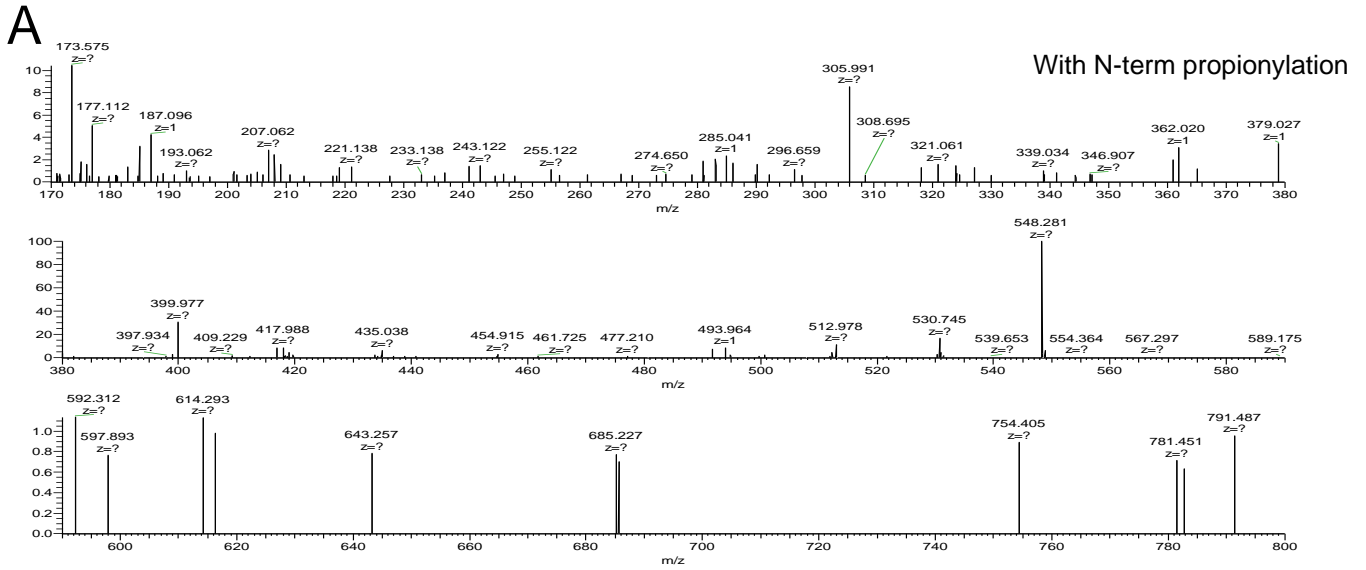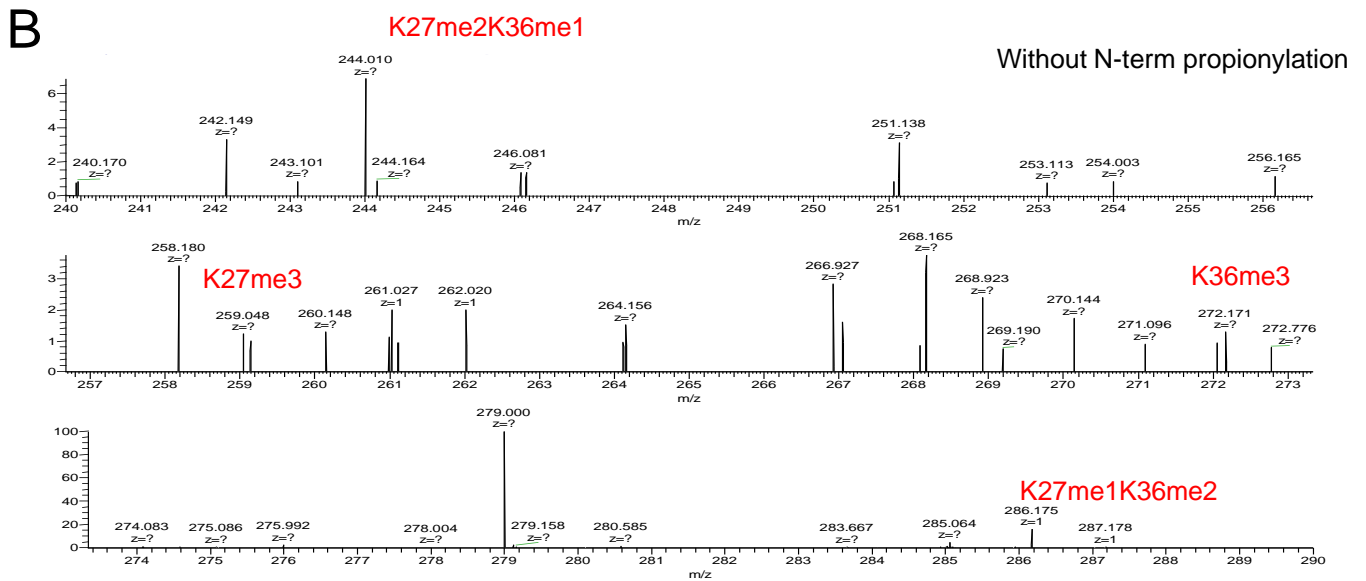

**C**

K27me3 K27me2K36me1 K36me3 K27me1K36me2

| Seq | #  | B          | B          | B          | B          |
|-----|----|------------|------------|------------|------------|
| K   | 1  | 171.14928  | 157.13358  | 185.12828  | 199.14415  |
| S   | 2  | 258.18131  | 244.16561  | 272.16031  | 286.17618  |
| A   | 3  | 329.21843  | 315.20273  | 343.19743  | 357.21329  |
| P   | 4  | 426.27119  | 412.25549  | 440.25019  | 454.26605  |
| A   | 5  | 497.30830  | 483.29260  | 511.28730  | 525.30317  |
| T   | 6  | 598.35598  | 584.34028  | 612.33498  | 626.35085  |
| G   | 7  | 655.37744  | 641.36174  | 669.35644  | 683.37231  |
| G   | 8  | 712.39891  | 698.38321  | 726.37791  | 740.39377  |
| V   | 9  | 811.46732  | 797.45162  | 825.44632  | 839.46219  |
| K   | 10 | 995.58828  | 995.58845  | 995.58828  | 995.58815  |
| K   | 11 | 1179.70925 | 1179.70941 | 1179.70925 | 1179.70911 |
| P   | 12 | 1276.76201 | 1276.76218 | 1276.76201 | 1276.76188 |
| H   | 13 | 1413.82092 | 1413.82109 | 1413.82092 | 1413.82079 |
| R   | 14 | 1569.92203 | 1569.92220 | 1569.92203 | 1569.92190 |

**Supplemental Figure 7: Full MS window and targeted SIM MSX acquisition.** (A) A representation of the Full MS window acquisition method. The ions selected at each scan are a narrow  $m/z$  range including all the modified and unmodified states of a specific histone peptide sequence. (B) The targeted SIM-MSX acquisition selects individual peptide  $m/z$ . The cycle time is reduced because these ions are multiplexed 10 by 10, so each MS scan contains up to 10 different peptides. In each of the two methods, the ions are temporarily accumulated in the ion routing multiple (IRM) before being injected in the mass analyzer, in this case the Orbitrap.

A

Full MS windows

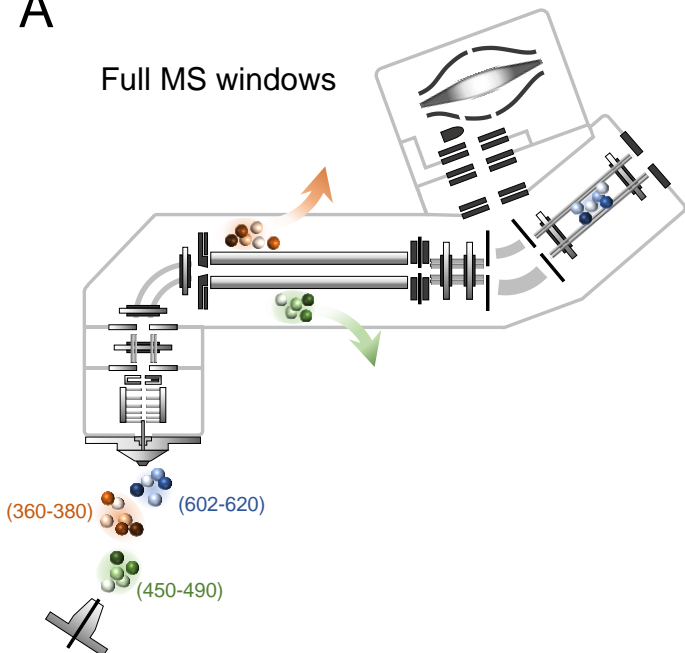

B

tSIM-MSX

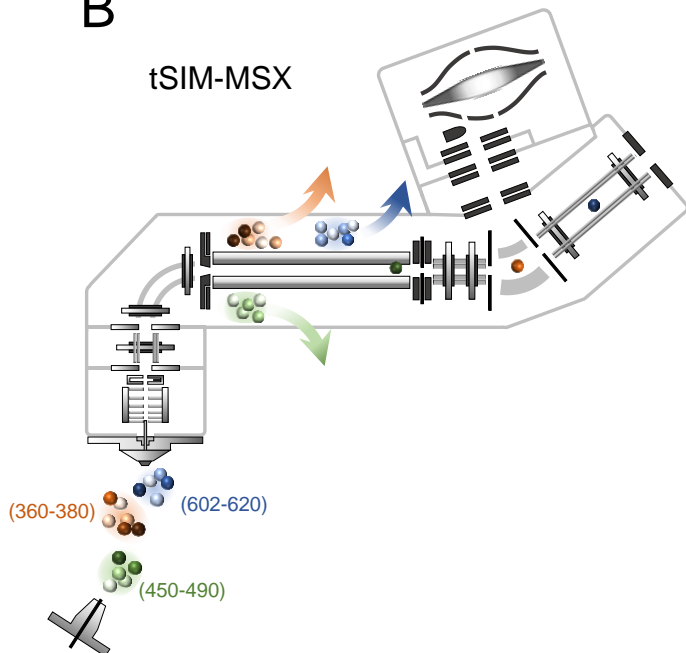



**Supplemental Figure 8:** Correlation analysis of quantified peptides in DI-MS vs LC-MS. Histones from both brain (left) and liver (right) tissues were analyzed using the tSIM-MSX acquisition method with direct injection and by “canonical” LC-MS analysis (DIA). The peptide quantifications had high correlations despite the different biases of the two methods, e.g. hydrophobicity of peptides affecting chromatographic retention in LC-MS mode.

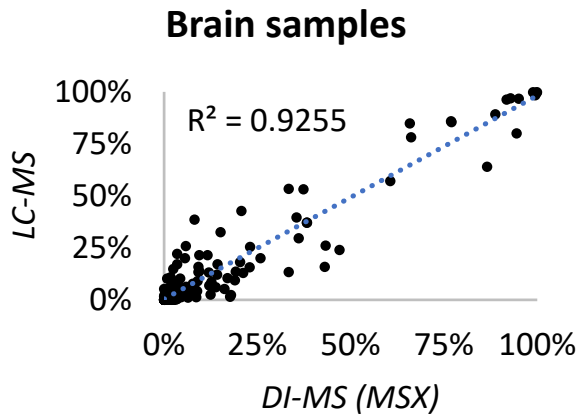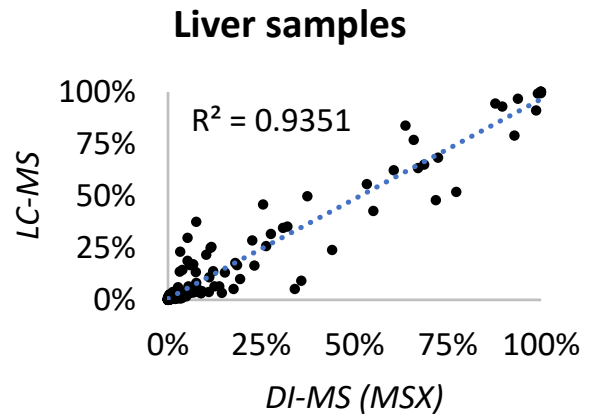

Supplement: supp_gr.247353.118_Supplemental_Figures_1-8.pdf [file supp_gr.247353.118_Supplemental_Figures_1-8.pdf]
