# Supplementary material for: One minute analysis of 200 histone posttranslational modifications by direct injection mass spectrometry
Source: HighWire-hosted journal article supplement (doi:10.1101/gr.247353.118), 2019-05-23
Supplement: Supplemental_Code_1.zip [file histone_scans_peptides.pdf › EpiProfileLite-master/histone_scans_peptides.pdf]

#scan peptides

- 1 H3\_3\_8
- 2 H3\_9\_17
- 3 H3\_27\_40
- 4 H3\_9\_17ph
- 5 H33\_27\_40
- 6 H3\_54\_63
- 7 H3\_73\_83
- 8 H4\_4\_17
- 9 H1\_1\_35
- 10 H2A1\_36\_42
- 11 H2A1\_4\_11
- 12 H2AV\_1\_19
- 13 H2A1\_12\_17
- 14 H2A\_1\_88
- 15 H3\_9\_17 K9ac-K14ac
- 16 H3\_9\_17 unmod-K9me1K14ac
- 17 H3\_9\_17 K9me2-K9me3K14ac
- 18 H3\_18\_26 K18ac-K23ac
- 19 H3\_18\_26 K18me1-K23me1
- 20 H3\_27\_40 1me
- 21 H3\_27\_40 2me
- 22 H3\_27\_40 3me
- 23 H3\_27\_40 4me
- 24 H33\_27\_40 1me
- 25 H33\_27\_40 2me
- 26 H33\_27\_40 3me
- 27 H33\_27\_40 4me
- 28 H4\_4\_17 1ac
- 29 H4\_4\_17 2ac
- 30 H4\_4\_17 3ac
- 31 H2A1\_4\_11 K5ac-K9ac
- 32 H2A1\_4\_11 H2A1K5me1-K9me1-H2AJK5ac-K9ac
- 33 H2A1\_4\_11 H2AJK5me1-K9me1
- 34 H2AX\_4\_11 K5ac-K9ac
- 35 H2AX\_4\_11 K5me1-K9me1
- 36 H2AV\_1\_19 1ac
- 37 H2AV\_1\_19 2ac
- 38 H2AV\_1\_19 3ac
- 39 H2AZ\_1\_19 1ac
- 40 H2AZ\_1\_19 2ac
- 41 H2AZ\_1\_19 3ac
- 42 H2A1\_12\_17 H2A1unmod-H2A3K13me1-K15me1
- 43 H2A1\_12\_17 H2A1K13ac-K15ac-H2A3unmod
- 44 H2A1\_12\_17 H2A1K13me1-K15me1
- 45 H3\_9\_17ph S10ph-K9me1S10phK14ac
- 46 H3\_9\_17ph K9me2S10ph-K9me3S10phK14ac
- 47 H3\_9\_17ph K9acS10ph-S10phK14ac
- 48 QC\_peptides
