# Supplementary material for: One minute analysis of 200 histone posttranslational modifications by direct injection mass spectrometry
Source: HighWire-hosted journal article supplement (doi:10.1101/gr.247353.118), 2019-05-23
Supplement: Supplemental_Table_1.xlsx [file Supplemental_Table_1.xlsx]

## Sheet: Sheet1
Supplemental Table 1: raw abundance of the synthetic peptide library quantified using LC-MS or DI-MS. In column A, the first term indicates the histone type, the numbering the amino acid sequence position within the protein, and last the modified state.
	LC-MS rep-1	LC-MS rep-2	LC-MS rep-3	DI-MS rep-1	DI-MS rep-2	DI-MS rep-3
H3_3_8 unmod	1428199000	1210366000	934771800	11336.3	9981.42	12079
H3_3_8 K4me1	1707949000	1406198000	1086142000	486.159	705.485	569.058
H3_3_8 K4me2	4149921	0	0	1663.69	1502.25	2277.13
H3_3_8 K4me3	0	0	11798820	5943.02	6190.83	5098.18
H3_9_17 unmod	2846315000	2471755000	2040858000	68942.1	61969.2	62946.7
H3_9_17 K9me1	2511651000	2193836000	1706187000	33494.1	33017.1	33921.2
H3_9_17 K9me2	3580113000	3298184000	2411873000	75712.6	72592.7	76932.8
H3_9_17 K9me3	3315682000	3107586000	2263134000	90321	79062.7	89021
H3_9_17 K9ac	2572982000	2336993000	1760802000	31324.5	29843	31499.9
H3_9_17 K14ac	3123181000	2541843000	2073773000	39663.9	38066.7	37898.3
H3_9_17 K9me1K14ac	2751653000	2378478000	1844033000	46825.5	62946.7	55825.7
H3_9_17 K9me2K14ac	515654200	436874800	369988400	113111	108299	113002
H3_9_17 K9acK14ac	2967245000	2646959000	2055506000	66105.4	75712.6	72592.7
H3_9_17 S10ph	736016700	874101100	712449600	27923.8	24396.7	28308.9
H3_9_17 K9me1S10ph	550780300	628939300	501869700	2562.09	2343.21	1713.12
H3_9_17 K9me2S10ph	2681215000	2512170000	1869397000	42279.1	41894.3	39560.2
H3_9_17 K9me3S10ph	2835981000	2406321000	1646924000	43185.4	40080.7	40588.8
H3_18_26 unmod	2397696000	2071273000	1705866000	75111.3	68584	71671.7
H3_18_26 K23me1	1938039000	1634884000	1448899000	54220.7	40521.6	46021.2
H3_18_26 K18me1	1505942000	1284631000	1121357000	74027.3	76781.7	71417.3
H3_18_26 K18ac	2508197000	2216905000	1746147000	74272.4	72863.5	71148.2
H3_18_26 K23ac	2347940000	1993047000	1562410000	67515.9	64895.7	67123.8
H3_18_26 K18acK23ac	2958669000	2447314000	1956362000	65507.9	62791.6	63676.2
H3_27_40 unmod	2755204000	2527491000	1930286000	20788.1	24172.2	23466.6
H3_27_40 K27me1	2466443000	2149349000	1674170000	17749.5	21524.6	16632.7
H3_27_40 K27me2	4544590000	3838932000	3059377000	72701.9	81217.5	79034.5
H3_27_40 K27me3	3869585000	3315274000	2709038000	105067	103861	106848
H33_27_40 unmod	3932121000	3302506000	2614560000	18078.3	15199.4	16402.9
H33_27_40 K27me1	2325141000	2041245000	1722837000	741.838	826.532	489.26
H33_27_40 K27me2	4600707000	4230433000	3124333000	770.968	1581.37	695.054
H33_27_40 K27me3	5126605000	4581814000	3404406000	44386.5	46629.8	48052.7
H3_41_49 unmod	1718291000	1513981000	1156019000	31620.4	27343.1	29002.9
H3_54_63 unmod	81951850	64142010	61372130	10948.5	10541	10972.4
H3_54_63 K56ac	510265300	442030900	414552200	40187.6	34163.2	35212.9
H3_73_83 unmod	20384110	16587870	19696810	31684	31391	28801.7
H3_73_83 K79me1	1104498	511741	1181142	4876.08	3587.75	4139.39
H3_73_83 K79me2	561632400	486699700	543339600	90082.7	86436.1	87545.4
H3_73_83 K79me3	610328900	550622300	599277900	100403	94181.3	96996.6
H4_1_17 unmod	1384470000	1154100000	864937500	3084.82	3173.2	3962.8
H4_1_17 R3me1	1102165000	995163700	777255000	3042.99	3905.5	3970.49
H4_4_17 unmod	1083704000	924608800	748165700	27449.8	27701.8	26696.9
H4_4_17 K5ac	1315549000	1032134000	866116000	25519.8	25850.4	25023.7
H4_4_17 K8ac	968197700	769840700	661157200	28737.4	31854.7	28832.5
H4_4_17 K12ac	992887300	837964600	740368100	563.743	545.104	335.141
H4_4_17 K16ac	1084228000	866899400	744778200	31929.8	33137.9	31653.9
H4_4_17 K5acK8ac	1177744000	976423600	839986600	28549.1	28145.5	28886.6
H4_4_17 K5acK12ac	1163349000	1068700000	827191000	43994.8	46961.8	44449.4
H4_4_17 K5acK16ac	416887500	655899800	449610400	33894.3	40571.3	35572.9
H4_4_17 K8acK12ac	657764400	607460000	505508700	35252	36264.8	34689.9
H4_4_17 K8acK16ac	841807000	810289700	573887400	30455.3	31605	31486
H4_4_17 K12acK16ac	1500659000	1029908000	803237700	36262.2	38967.9	37807.7
H4_4_17 K5acK8acK12ac	1096471000	988402600	790659200	24369.2	28206.1	27315.6
H4_4_17 K5acK8acK16ac	1042356000	867482300	799743300	26273.4	29787.4	28219.2
H4_4_17 K5acK12acK16ac	1241454000	1108661000	860660400	31866.6	33422.8	34179.7
H4_4_17 K8acK12acK16ac	1201530000	1031719000	852239800	24201.3	25419.2	21843.6
H4_4_17 K5acK8acK12acK16ac	1405132000	1221842000	923033900	25227.9	25789.6	27087.6
H4_20_23 unmod	1744796000	1483743000	1162208000	20932.3	38275.1	32061.2
H4_20_23 K20me1	1666072000	1342995000	1034313000	20633.1	35023.3	32279.7
H4_20_23 K20me2	1569109000	1261677000	1005669000	4504.3	3852.7	3478.5
H4_20_23 K20me3	1674896000	1425321000	1005446000	1712.2	2421.5	1921.2
H4_68_78 unmod	1809112000	1595119000	1269409000	34636.3	39323.9	36656.9
