# Supplementary material for: One minute analysis of 200 histone posttranslational modifications by direct injection mass spectrometry
Source: HighWire-hosted journal article supplement (doi:10.1101/gr.247353.118), 2019-05-23
Supplement: Supplemental_Table_2.xlsx [file Supplemental_Table_2.xlsx]

## Sheet: Sheet1
Supplemental Table 2: Relative abundances of peptides derived from the digestion and derivatization of the "histone-like" engineered sequence. Different sample preparations were utilized to "stress" the efficiency of peptide derivatization and digestion. Besides the control (described in materials and methods), we tested the same protocol utilizing only 1 uL of propionic anhydride instead of 5, a…
Sample preparation method	Peptide type	LC-MS	DI-MS	Stdev	LC-MS	DI-MS
Control	Complete	0.860767	0.83996		0.00346023	0.0267948
Control	Over-propionylation	0	0.00274431		0	0.00250124
Control	Incomplete digest	0.000505885	0.00109456		5.67259e-05	0.00102808
Control	Oxidation	0.131317	0.0444402		0.00326417	0
Control	Under-propionylation	0.00741027	0.111761		0.00204567	0.0302754
1 uL anhydride	Complete	0.86652	0.868629		0.0260519	0.0548305
1 uL anhydride	Over-propionylation	0.00434695	0.0163158		0.00531131	0.0187107
1 uL anhydride	Incomplete digest	0.0468232	0.0408721		0.0355152	0.0582696
1 uL anhydride	Oxidation	0.0821859	0.0347305		0.0223774	0
1 uL anhydride	Under-propionylation	0.000124241	0.0394525		5.90581e-05	0.0222382
1 uL anhydride pH>10	Complete	0.890608	0.902116		0.00130482	0.00816283
1 uL anhydride pH>10	Over-propionylation	2.50168e-05	3.16633e-05		3.16491e-05	5.82067e-05
1 uL anhydride pH>10	Incomplete digest	0.00211831	0.00452901		0.00244147	0.0044215
1 uL anhydride pH>10	Oxidation	0.105955	0.0281055		0.0015046	0
1 uL anhydride pH>10	Under-propionylation	0.0012944	0.0652177		0.00124095	0.00798297
