# Supplementary material for: One minute analysis of 200 histone posttranslational modifications by direct injection mass spectrometry
Source: HighWire-hosted journal article supplement (doi:10.1101/gr.247353.118), 2019-05-23
Supplement: Supplemental_Table_3_.xlsx [file Supplemental_Table_3_.xlsx]

## Sheet: Sheet1
Supplemental Table 3: tSIM-MSX scans. Full description of the m/z values acquired as targeted SIM scans multiplexed 10 by 10. Some of the masses are not indexed, because they are already present within other SIM scans due to other isobaric or nearly isobaric forms.
The table contains the first 14 scan events; the other scan events are the MS/MS scans to discriminate isobaric forms and the QC peptide scan (full description in Supplementary Material).
Peptide	m/z no N-term	MSX index	In which scan this mass is?
TKQTAR(H3_3_8)
H3_3_8 unmod	380.719	1	1
H3_3_8 K4me1	387.727	1	1
H3_3_8 K4me2	366.722	1	1
H3_3_8 K4me3	373.73	1	1
H3_3_8 K4ac	373.712		1
KQLATKAAR(H3_18_26)
H3_18_26 unmod	549.835	1	1
H3_18_26 K23me1	556.843	1	1
H3_18_26 K18me1	556.843		1
H3_18_26 K18me1K23me1	563.851	1	1
H3_18_26 K18ac	542.827	1	1
H3_18_26 K23ac	542.827		1
H3_18_26 K18acK23ac	535.82	1	1
KSTGGKAPR(H3_9_17)
H3_9_17 unmod	507.291	2	2
H3_9_17 K9me1	514.298	2	2
H3_9_17 K9me2	493.293	2	2
H3_9_17 K9me3	500.301	2	2
H3_9_17 K9ac	500.283		2
H3_9_17 K14ac	500.283		2
H3_9_17 K9me1K14ac	507.291		2
H3_9_17 K9me2K14ac	486.285	2	2
H3_9_17 K9me3K14ac	493.293		2
H3_9_17 K9acK14ac	493.275		2
KSTGGKAPR(H3_9_17)
H3_9_17 S10ph	547.274	4	4
H3_9_17 K9me1S10ph	554.282	4	4
H3_9_17 K9me2S10ph	533.276	4	4
H3_9_17 K9me3S10ph	540.284	4	4
H3_9_17 K9acS10ph	540.266		4
H3_9_17 S10phK14ac	540.266		4
H3_9_17 K9me1S10phK14ac	547.274		4
H3_9_17 K9me2S10phK14ac	526.269	4	4
H3_9_17 K9me3S10phK14ac	533.276		4
H3_9_17 K9acS10phK14ac	533.258		4
KSAPATGGVKKPHR(H3_27_40)
H3_27_40 unmod	534.642	3	3
H3_27_40 K36me1	539.314	3	3
H3_27_40 K27me1	539.314		3
H3_27_40 K27me2	525.311	3	3
H3_27_40 K36me2	525.311		3
H3_27_40 K27me3	529.983	3	3
H3_27_40 K36me3	529.983		3
H3_27_40 K27me2K36me1	529.983		3
H3_27_40 K27me1K36me2	529.983		3
H3_27_40 K27me1K36me1	543.986	3	3
H3_27_40 K27me3K36me1	534.654		3
H3_27_40 K27me1K36me3	534.654		3
H3_27_40 K27me2K36me2	515.979	3	3
H3_27_40 K27me3K36me2	520.651	3	3
H3_27_40 K27ac	529.97		3
KSAPATGGVKKPHR(H3_27_40)
H3_27_40 S28ph	551.96	4	4
H3_27_40 K27me1S28ph	556.632	4	4
H3_27_40 K27me2S28ph	542.628	4	4
H3_27_40 K27me3S28ph	547.3		4
KSAPSTGGVKKPHR(H33_27_40)
H33_27_40 unmod	539.974	5	5
H33_27_40 K36me1	544.646	5	5
H33_27_40 K27me1	544.646		5
H33_27_40 K27me2	530.642	5	5
H33_27_40 K36me2	530.642		5
H33_27_40 K27me3	535.314	5	5
H33_27_40 K36me3	535.314		5
H33_27_40 K27me2K36me1	535.314		5
H33_27_40 K27me1K36me2	535.314		5
H33_27_40 K27me1K36me1	549.318	5	5
H33_27_40 K27me3K36me1	539.986		5
H33_27_40 K27me1K36me3	539.986		5
H33_27_40 K27me2K36me2	521.311	5	5
H33_27_40 K27me3K36me2	525.983	5	5
H33_27_40 K27ac	535.302		5
KSAPSTGGVKKPHR(H33_27_40)
H33_27_40 S28ph	557.292	6	6
H33_27_40 K27me1S28ph	561.964	6	6
H33_27_40 K27me2S28ph	547.96	6	6
H33_27_40 K27me3S28ph	552.632	6	6
YQKSTELLIR(H3_54_63)			6
H3_54_63 unmod	653.872	6	6
H3_54_63 K56me1	660.88	6	6
H3_54_63 K56me2	639.875	6	6
H3_54_63 K56me3	646.882	6	6
H3_54_63 K56ac	646.864		6
EIAQDFKTDLR(H3_73_83)
H3_73_83 unmod	696.362	7	7
H3_73_83 K79me1	703.37	7	7
H3_73_83 K79me2	682.365	7	7
H3_73_83 K79me3	689.372	7	7
H3_73_83 K79ac	689.354		7
VTIMPKDIQLAR(H3_117_128)
H3_117_128 unmod	720.916	7	7
H3_117_128 K122ac	713.908	7	7
RGGVKR(H4_40_45)
H4_40_45 unmod	364.73	7	7
H4_40_45 K44ac	357.722	7	7
GKGGKGLGKGGAKR(H4_4_17)
H4_4_17 unmod	747.941	8	8
H4_4_17 K5ac	740.933	8	8
H4_4_17 K8ac	740.933		8
H4_4_17 K12ac	740.933		8
H4_4_17 K16ac	740.933		8
H4_4_17 K5acK8ac	733.926	8	8
H4_4_17 K5acK12ac	733.926		8
H4_4_17 K5acK16ac	733.926		8
H4_4_17 K8acK12ac	733.926		8
H4_4_17 K8acK16ac	733.926		8
H4_4_17 K12acK16ac	733.926		8
H4_4_17 K5acK8acK12ac	726.918	8	8
H4_4_17 K5acK8acK16ac	726.918		8
H4_4_17 K5acK12acK16ac	726.918		8
H4_4_17 K8acK12acK16ac	726.918		8
H4_4_17 K5acK8acK12acK16ac	719.91	8	8
KVLR(H4_20_23)
H4_20_23 unmod	286.2	8	8
H4_20_23 K20me1	293.208	8	8
H4_20_23 K20me2	272.203	8	8
H4_20_23 K20me3	279.21	8	8
H4_20_23 K20ac	279.192		8
unmod(H1_1_35)
H1_1_35 H11.SETAPVAQAASTATEKPAAAKKTKKPAKAAAPR	896.748	9	9
H1_1_35 H12.SEAAPAAPAAAPPAEKAPAKKKAAKKPAGVR	837.723	9	9
H1_1_35 H13.SETAPAAPAAPAPVEKTPVKKKAKKTGAAAGKR	913.278	9	9
H1_1_35 H14.SETAPAAPAAPAPAEKTPVKKKAR	639.61	9	9
H1_1_35 H15.SETAPAETAAPAPVEKSPAKKKTTKKAGAAKR	939.769	9	9
unmod(H1_54_81)
H1_54_81 H11.SGVSLAALKKSLAAAGYDVEKNNSR	881.814	9	9
H1_54_81 H1v234.SGVSLAALKKALAAAGYDVEKNNSR	891.818	9	9
H1_54_81 H15.GGVSLPALKKALAAGGYDVEKNNSR	900.822	9	9
H1_54_81 H1T.AGMSLAALKKALAAAGYDVEKNNSR	915.831	9	9
SGRGKQGGKAR(H2A1_1_11)
H2A1_1_11 unmod	405.23	2	2
H2A1_1_11 S1ac	419.233	2	2
H2A1_1_11 K5ac	400.558	2	2
H2A1_36_42 unmod	447.228	10	10
H2A1_36_42 K36ac	440.22	10	10
H2A1_36_42 Y39ac	468.233	10	10
KGNYSER(H2A3_36_42)
H2A3_36_42 unmod	455.225	10	10
H2A3_36_42 K36ac	448.217		10
H2A3_36_42 Y39ac	476.23	10	10
KGHYAER(H2AX_36_42)
H2AX_36_42 unmod	458.736	10	10
H2AX_36_42 K36ac	451.728	10	10
H2AX_36_42 Y39ac	479.741	10	10
GKQGGKAR(H2A1_4_11)
H2A1_4_11 unmod	457.264	11	11
H2A1_4_11 K5ac	450.257	11	11
H2A1_4_11 K9ac	450.257		11
H2A1_4_11 K5acK9ac	443.249	11	11
H2A1_4_11 K9me1	464.272	11	11
H2A1_4_11 K5me1	464.272		11
GKQGGKVR(H2AJ_4_11)
H2AJ_4_11 unmod	471.28	11	11
H2AJ_4_11 K5ac	464.272		11
H2AJ_4_11 K9ac	464.272		11
H2AJ_4_11 K5acK9ac	457.264		11
H2AJ_4_11 K9me1	478.288	11	11
H2AJ_4_11 K5me1	478.288		11
GKTGGKAR(H2AX_4_11)
H2AX_4_11 unmod	443.759		11
H2AX_4_11 K5ac	436.751	11	11
H2AX_4_11 K9ac	436.751		11
H2AX_4_11 K5acK9ac	429.743		11
H2AX_4_11 K9me1	450.767		11
H2AX_4_11 K5me1	450.767		11
AGGKAGKDSGKAKAKAVSR(H2AV_1_19)
H2AV_1_19 unmod	689.723	12	12
H2AV_1_19 K4ac	685.052	12	12
H2AV_1_19 K7ac	685.052		12
H2AV_1_19 K11ac	685.052		12
H2AV_1_19 K15ac	685.052		12
H2AV_1_19 K4acK7ac	680.38	12	12
H2AV_1_19 K4acK11ac	680.38		12
H2AV_1_19 K4acK15ac	680.38		12
H2AV_1_19 K7acK11ac	680.38		12
H2AV_1_19 K7acK15ac	680.38		12
H2AV_1_19 K11acK15ac	680.38		12
H2AV_1_19 K7acK11acK15ac	675.708	12	12
H2AV_1_19 K4acK11acK15ac	675.708		12
H2AV_1_19 K4acK7acK15ac	675.708		12
H2AV_1_19 K4acK7acK11ac	675.708		12
H2AV_1_19 K4acK7acK11acK15ac	671.036	12	12
AGGKAGKDSGKAKTKAVSR(H2AZ_1_19)
H2AZ_1_19 unmod	699.727	12	12
H2AZ_1_19 K4ac	695.055	12	12
H2AZ_1_19 K7ac	695.055		12
H2AZ_1_19 K11ac	695.055		12
H2AZ_1_19 K15ac	695.055		12
H2AZ_1_19 K4acK7ac	690.383		12
H2AZ_1_19 K4acK11ac	690.383		12
H2AZ_1_19 K4acK15ac	690.383		12
H2AZ_1_19 K7acK11ac	690.383		12
H2AZ_1_19 K7acK15ac	690.383		12
H2AZ_1_19 K11acK15ac	690.383		12
H2AZ_1_19 K7acK11acK15ac	685.711		12
H2AZ_1_19 K4acK11acK15ac	685.711		12
H2AZ_1_19 K4acK7acK15ac	685.711		12
H2AZ_1_19 K4acK7acK11ac	685.711		12
H2AZ_1_19 K4acK7acK11acK15ac	681.039		12
AKAKTR(H2A1_12_17)
H2A1_12_17 unmod	393.745	13	13
H2A1_12_17 K13ac	386.738	13	13
H2A1_12_17 K15ac	386.738		13
H2A1_12_17 K15me1	400.753	13	13
H2A1_12_17 K13me1	400.753		13
H2A1_12_17 T16ac	414.751	13	13
AKAKSR(H2A3_12_17)
H2A3_12_17 unmod	386.738		13
H2A3_12_17 K13ac	379.73	13	13
H2A3_12_17 K15ac	379.73		13
H2A3_12_17 K15me1	393.745		13
H2A3_12_17 K13me1	393.745		13
H2A3_12_17 S16ac	407.743	13	13
DNKKTR(H2A1_72_77)
H2A1_72_77 unmod	437.243	13	13
H2A1_72_77 K74ac	430.235	13	13
unmod(H2A_1_88)
H2A_1_88 H2A14s.HLQLAIR	425.767	14	14
H2A_1_88 H2AZ.AGGKAGKDSGKAKTKAVSR	690.389	14	14
H2A_1_88 H2AY.SAKAGVIFPVGR	629.369	14	14
H2A_1_88 H2AX.GKTGGKAR	443.759	14	14
unmod(H2B_1_29)
H2B_1_29 1C.PEPAKSAPAPKKGSKKAVTKAQKKDGKKR	905.775	14	14
H2B_1_29 1H.PEPAKSAPAPKKGSKKALTKAQKKDGKKR	902.271	14	14
H2B_1_29 2B.PDPAKSAPAPKKGSKKAVTKVQKKDGKKR	909.279	14	14
H2B_1_29 1B.PEPSKSAPAPKKGSKKAISKAQKKDGKKR	913.278	14	14
H2B_1_29 3B.PDPSKSAPAPKKGSKKAVTKAQKKDGKKR	909.774		14
H2B_1_29 1M.PEPTKSAPAPKKGSKKAVTKAQKKDGKKR	913.278		14
H2B_1_29 1P.PEPVKSVPAPKKGSKKAVTKAQKKDGKKR	926.543	14	14
H2B_1_29 2E.PELAKSAPAPKKGSKKAVTKAQKKDGKKR	909.783		14
