# Supplementary material for: One minute analysis of 200 histone posttranslational modifications by direct injection mass spectrometry
Source: HighWire-hosted journal article supplement (doi:10.1101/gr.247353.118), 2019-05-23
Supplement: Supplemental_Table_4.xlsx [file Supplemental_Table_4.xlsx]

## Sheet: Sheet1
Supplemental Table 4: Relative abundance of peptides quantified using LC-MS or DI-MS. Three replicates were performed for each analysis. Both brain and liver tissues were analyzed.
Peptide	MSX	Brain rep-1	Brain rep-2	Brain rep-3	Liver rep-1	Liver rep-2	Liver rep-3	LC-MS	Brain rep-1	Brain rep-2	Brain rep-3	Liver rep-1	Liver rep-2	Liver rep-3	Avg brain	MSX	LC-MS	Avg liver	MSX	LC-MS
H3_3_8 unmod		0.941122	0.900084	0.941915	0.963545	0.972148	0.970256		0.93949	0.93909	0.934557	0.968906	0.963728	0.966049		0.927707	0.96865		0.937712	0.966228
H3_3_8 K4me1		0.048602	0.066428	0.050314	0.030864	0.02204	0.023097		0.060109	0.059669	0.06444	0.031093	0.035965	0.03394		0.0551147	0.0253337		0.061406	0.033666
H3_3_8 K4me2		0.003644	0.004007	0.00406	0.004187	0.004679	0.004558		0.000402	1e-05	1.3e-05	2e-06	8e-06	1.1e-05		0.00390367	0.00447467		0.000141667	7e-06
H3_3_8 K4me3		0.005512	0.026647	0.00283	0.001404	0.000734	0.001531		0	0	0	0	0	0		0.011663	0.001223		0	0
H3_3_8 K4ac		0.00112	0.002835	0.000881	0	0.000399	0.000558		0	0.001231	0.00099	0	0.000298	0		0.001612	0.000319		0.000740333	9.93333e-05
H3_9_17 unmod		0.131209	0.142957	0.178311	0.320269	0.330956	0.325178		0.117172	0.106758	0.126195	0.242974	0.266442	0.255162		0.150826	0.325468		0.116708	0.254859
H3_9_17 K9me1		0.086167	0.083853	0.097631	0.101069	0.084418	0.08401		0.077928	0.065065	0.083762	0.073196	0.090932	0.076555		0.089217	0.0898323		0.075585	0.0802277
H3_9_17 K9me2		0.086074	0.07	0.075709	0.068907	0.090983	0.072362		0.184265	0.177942	0.181491	0.178187	0.176505	0.178133		0.077261	0.0774173		0.181233	0.177608
H3_9_17 K9me3		0.130629	0.1202	0.13091	0.078939	0.100899	0.077061		0.152409	0.146612	0.159383	0.129099	0.125128	0.137481		0.127246	0.085633		0.152801	0.130569
H3_9_17 K9ac		0.036667	0.03743	0.038939	0.028543	0.026665	0.029585		0.048268	0.026723	0.02141	0.034587	0.020977	0.032223		0.0376787	0.0282643		0.0321337	0.0292623
H3_9_17 K14ac		0.087507	0.089674	0.099402	0.163454	0.142999	0.170213		0.057025	0.074601	0.092987	0.132121	0.140877	0.126354		0.0921943	0.158889		0.074871	0.133117
H3_9_17 K9me1K14ac		0.074564	0.080659	0.092002	0.054049	0.0489	0.048959		0.069747	0.068602	0.076248	0.046068	0.052212	0.046466		0.0824083	0.050636		0.0715323	0.0482487
H3_9_17 K9me2K14ac		0.210724	0.202645	0.154567	0.094249	0.086616	0.102584		0.19468	0.211883	0.173648	0.111811	0.087021	0.09941		0.189312	0.094483		0.193404	0.099414
H3_9_17 K9me3K14ac		0.123079	0.129601	0.110344	0.067115	0.068429	0.072027		0.078558	0.099829	0.068324	0.041945	0.032606	0.038659		0.121008	0.0691903		0.082237	0.0377367
H3_9_17 K9acK14ac		0.02669	0.030526	0.019532	0.013536	0.011099	0.014527		0.019948	0.021984	0.016552	0.010012	0.007301	0.009557		0.0255827	0.013054		0.0194947	0.00895667
H3_18_26 unmod		0.676815	0.64803	0.660192	0.772878	0.791147	0.7769		0.659573	0.65343	0.663405	0.761702	0.784796	0.760283		0.661679	0.780308		0.658803	0.768927
H3_18_26 K23me1		0.000565	0.00095	0.000605	0.000687	0.000571	0.000483		0.004763	0.000527	0.000625	0.000247	0.000293	0.000266		0.000706667	0.000580333		0.00197167	0.000268667
H3_18_26 K18me1		0.001983	0.002767	0.002411	0.001905	0.001649	0.001599		0.004726	0.004584	0.00519	0.002669	0.00273	0.002866		0.002387	0.00171767		0.00483333	0.002755
H3_18_26 K18me1K23me1		0.003652	0.003822	0.00154	0.000937	0.001029	0.00172		0.00044	0.001093	0.000264	0.000209	9.5e-05	5.1e-05		0.00300467	0.00122867		0.000599	0.000118333
H3_18_26 K18ac		0.057396	0.055186	0.059594	0.041025	0.039379	0.042348		0.056788	0.059228	0.06024	0.04218	0.043248	0.044909		0.057392	0.0409173		0.058752	0.0434457
H3_18_26 K23ac		0.216467	0.235655	0.236276	0.162714	0.149141	0.15596		0.228174	0.235712	0.23231	0.170454	0.151072	0.170507		0.229466	0.155938		0.232065	0.164011
H3_18_26 K18acK23ac		0.043123	0.05359	0.039383	0.019854	0.017084	0.02099		0.045535	0.045426	0.037968	0.022538	0.017766	0.021117		0.0453653	0.0193093		0.0429763	0.0204737
H3_27_40 unmod		0.072442	0.044743	0.125666	0.352445	0.401097	0.40225		0.068588	0.072573	0.086772	0.37298	0.371818	0.377351		0.0809503	0.385264		0.0759777	0.37405
H3_27_40 K36me1		0.042657	0.10472	0.035809	0.028415	0.028545	0.036143		0.029768	0.02393	0.028311	0.031303	0.015921	0.055354		0.061062	0.0310343		0.0273363	0.0341927
H3_27_40 K27me1		0.096352	0.247409	0.084853	0.164347	0.165569	0.184531		0.050799	0.059795	0.067795	0.162079	0.187686	0.150334		0.142871	0.171482		0.059463	0.1667
H3_27_40 K27me2		0.144279	0.085367	0.118135	0.238918	0.210613	0.193973		0.069418	0.06828	0.065809	0.170883	0.175662	0.168062		0.115927	0.214501		0.0678357	0.171536
H3_27_40 K36me2		0.075686	0.049574	0.066722	0.035008	0.02454	0.02873		0.061674	0.06125	0.064666	0.039671	0.03652	0.036048		0.063994	0.029426		0.06253	0.037413
H3_27_40 K27me3		0.032625	0.025844	0.036257	0.020581	0.020271	0.01464		0.008723	0.008741	0.007258	0.01652	0.017083	0.014141		0.0315753	0.0184973		0.00824067	0.0159147
H3_27_40 K36me3		0.045001	0.019606	0.038176	0.018369	0.032048	0.03662		0.034377	0.025661	0.025948	0.020303	0.018938	0.024126		0.034261	0.0290123		0.028662	0.0211223
H3_27_40 K27me2K36me1		0.089177	0.064509	0.098557	0.036162	0.040237	0.035376		0.071671	0.073279	0.088866	0.039396	0.040066	0.036221		0.084081	0.0372583		0.0779387	0.038561
H3_27_40 K27me1K36me2		0.126473	0.098873	0.149224	0.025185	0.027815	0.022775		0.137352	0.141705	0.15428	0.032734	0.034672	0.034907		0.124857	0.0252583		0.144446	0.0341043
H3_27_40 K27me1K36me1		0.02506	0.038248	0.02515	0.025019	0.037411	0.019379		0.04028	0.039412	0.048289	0.026372	0.029998	0.02814		0.029486	0.0272697		0.0426603	0.02817
H3_27_40 K27me3K36me1		0.005842	0.00631	0.011482	0.004588	0	0		0.009756	0.008553	0.010286	0.004911	0.00495	0.004898		0.007878	0.00152933		0.00953167	0.00491967
H3_27_40 K27me1K36me3		0.025568	0.010367	0.019435	0.009292	0	0		0.016411	0.017196	0.018603	0.008691	0.009168	0.007204		0.0184567	0.00309733		0.0174033	0.00835433
H3_27_40 K27me2K36me2		0.184161	0.17739	0.170168	0.034357	0.003612	0.005694		0.361617	0.359781	0.299343	0.059588	0.04508	0.051944		0.17724	0.0145543		0.340247	0.052204
H3_27_40 K27me3K36me2		0.01937	0.019764	0.018002	0.001487	0.00143	0.003779		0.039566	0.039216	0.03302	0.008886	0.006785	0.007938		0.0190453	0.002232		0.0372673	0.00786967
H3_27_40 K27ac		0.008877	0.005609	0	0.00449	0.00529	0.004073		0	0.000627	0.000755	0.005682	0.005652	0.003332		0.00482867	0.00461767		0.000460667	0.00488867
H33_27_40 unmod		0.014163	0.031496	0.026948	0.018196	0.005872	0.028402		0.05181	0.04691	0.059789	0.250575	0.27242	0.372775		0.0242023	0.01749		0.0528363	0.29859
H33_27_40 K36me1		0.0051	0.043426	0.031672	0.008658	0.00917	0.009506		0.02647	0.024596	0.029278	0.035506	0.045562	0.070237		0.0267327	0.00911133		0.0267813	0.050435
H33_27_40 K27me1		0.00227	0.022442	0.016727	0.010164	0.009695	0.006867		0.029679	0.030317	0.036288	0.125543	0.132287	0.147122		0.013813	0.00890867		0.0320947	0.134984
H33_27_40 K27me2		0.033693	0.018376	0.015555	0.006889	0.008186	0.015253		0.033323	0.037229	0.045532	0.134649	0.159665	0.135672		0.0225413	0.0101093		0.0386947	0.143329
H33_27_40 K36me2		0.033676	0.024017	0.025112	0.003591	0.004364	0.008987		0.069161	0.067961	0.075039	0.069586	0.052645	0.046952		0.0276017	0.00564733		0.0707203	0.0563943
H33_27_40 K27me3		0.039499	0.014399	0.03361	0.100173	0.101945	0.06267		0.005765	0.007124	0.008984	0.018249	0.02225	0.033947		0.0291693	0.0882627		0.007291	0.0248153
H33_27_40 K36me3		0.02801	0.014376	0.031542	0.171601	0.182863	0.089018		0.028762	0.022604	0.01977	0.031511	0.021026	0		0.0246427	0.147827		0.023712	0.0175123
H33_27_40 K27me2K36me1		0.041293	0.015469	0.028177	0.031033	0.027994	0.02871		0.068016	0.071311	0.082973	0.076911	0.042027	0.018706		0.028313	0.0292457		0.0741	0.0458813
H33_27_40 K27me1K36me2		0.051077	0.020747	0.038321	0.01255	0.014194	0.015357		0.165969	0.177275	0.183516	0.049567	0.056125	0.047794		0.036715	0.0140337		0.175587	0.051162
H33_27_40 K27me1K36me1		0.037466	0.023001	0.066969	0.010932	0.011415	0.055395		0.04255	0.039081	0.0485	0.038611	0.046645	0		0.0424787	0.025914		0.043377	0.0284187
H33_27_40 K27me3K36me1		0.03162	0.071169	0.076706	0.066393	0.05874	0.061691		0.008614	0.008024	0.01031	0.0057	0.006434	0.004303		0.0598317	0.0622747		0.00898267	0.005479
H33_27_40 K27me1K36me3		0.014201	0.041445	0.075215	0.09755	0.117185	0.088347		0.032627	0.031853	0.035899	0.026687	0.028539	0.018448		0.0436203	0.101027		0.0334597	0.024558
H33_27_40 K27me2K36me2		0.281881	0.186514	0.167481	0.151007	0.11935	0.114795		0.385506	0.376161	0.312073	0.101528	0.08009	0.091716		0.211959	0.128384		0.357913	0.0911113
H33_27_40 K27me3K36me2		0.117687	0.285069	0.206745	0.212308	0.191429	0.137951		0.051748	0.051687	0.043099	0.020024	0.017369	0.012328		0.203167	0.180563		0.0488447	0.0165737
H33_27_40 K27ac		0.185817	0.131311	0.107543	0.061247	0.111546	0.190301		0	0.007868	0.00895	0.015352	0.016917	0		0.141557	0.121031		0.005606	0.0107563
H3_54_63 unmod		0.760239	0.958491	0.945136	0.974546	0.942244	0.75551		0.999654	0.999471	0.999845	0.995951	0.999995	0.988398		0.887955	0.890767		0.999657	0.994781
H3_54_63 K56me1		0.094984	0.021769	0.021257	0.003286	0.025117	0.010162		0	8e-06	0	0	0	0		0.0460033	0.012855		2.66667e-06	0
H3_54_63 K56me2		0.031684	0.011297	0.009457	0.004821	0	0.015555		0	0	1e-05	0	0	0		0.0174793	0.006792		3.33333e-06	0
H3_54_63 K56me3		0.022241	0.008443	0.009068	0.006893	0.014704	0.009258		9.2e-05	0	0	0.003926	5e-06	0.011581		0.0132507	0.010285		3.06667e-05	0.00517067
H3_54_63 K56ac		0.090852	0	0.015082	0.010455	0.017936	0.209515		0.000254	0.000521	0.000144	0.000124	0	2.1e-05		0.0353113	0.079302		0.000306333	4.83333e-05
H3_73_83 unmod		0.706755	0.752141	0.847951	0.883109	0.897028	0.796875		0.878914	0.896744	0.913798	0.94025	0.935125	0.911802		0.768949	0.859004		0.896485	0.929059
H3_73_83 K79me1		0.189182	0.212822	0.108714	0.103716	0.079531	0.131705		0.093743	0.077571	0.06814	0.042299	0.050416	0.065137		0.170239	0.104984		0.079818	0.0526173
H3_73_83 K79me2		0.054974	0.017739	0.026349	0.009301	0.016071	0.02422		0.027343	0.021689	0.015996	0.017434	0.014436	0.023061		0.0330207	0.0165307		0.021676	0.0183103
H3_73_83 K79me3		0.049089	0.005261	0.012849	0	0.00355	0		0	0.003972	0.002066	0	0	0		0.0223997	0.00118333		0.00201267	0
H3_73_83 K79ac		0	0.012037	0.004136	0.003874	0.00382	0.047199		0	2.4e-05	0	1.7e-05	2.3e-05	0		0.005391	0.0182977		8e-06	1.33333e-05
H3_117_128 unmod		0.995433	0.997095	0.998596	0.997518	0.990664	0.991456		0.999925	0.999657	0.999745	0.999445	0.999372	1		0.997041	0.993213		0.999776	0.999606
H3_117_128 K122ac		0.004567	0.002905	0.001404	0.002482	0.009336	0.008544		7.5e-05	0.000343	0.000255	0.000555	0.000628	0		0.00295867	0.00678733		0.000224333	0.000394333
H4_4_17 unmod		0.376209	0.36248	0.381794	0.522812	0.562485	0.508433		0.361172	0.371818	0.390183	0.494076	0.495373	0.503576		0.373494	0.531243		0.374391	0.497675
H4_4_17 K5ac		0.007147	0.007042	0.005932	0.02995	0.028753	0.034273		0.014726	0.013438	0.012413	0.03947	0.034236	0.040871		0.006707	0.030992		0.0135257	0.0381923
H4_4_17 K8ac		0.014662	0.012273	0.01135	0.020059	0.0166	0.019045		0.01971	0.018859	0.020101	0.022885	0.026356	0.019831		0.0127617	0.018568		0.0195567	0.023024
H4_4_17 K12ac		0.001555	0.008679	0.011879	0.049564	0.038507	0.042555		0.026178	0.028333	0.028989	0.060519	0.059721	0.058366		0.007371	0.043542		0.0278333	0.0595353
H4_4_17 K16ac		0.466054	0.463933	0.478403	0.22782	0.227992	0.263933		0.445496	0.441488	0.432396	0.233013	0.243537	0.23959		0.469463	0.239915		0.439793	0.238713
H4_4_17 K5acK8ac		0.002977	0.001395	0.001793	0.001565	0.001872	0.002311		0.005796	0.005793	0.005261	0.005464	0.004848	0.005848		0.002055	0.001916		0.00561667	0.00538667
H4_4_17 K5acK12ac		0.004101	0.005976	0.004253	0.034177	0.027814	0.03184		0.00644	0.005869	0.005399	0.027133	0.025792	0.024703		0.00477667	0.031277		0.00590267	0.025876
H4_4_17 K5acK16ac		0.014518	0.017721	0.011596	0.012143	0.011089	0.005834		0.014026	0.012749	0.012998	0.015044	0.015713	0.014275		0.0146117	0.00968867		0.0132577	0.0150107
H4_4_17 K8acK16ac		0.033231	0.035806	0.030105	0.020644	0.019416	0.020804		0.030822	0.026787	0.027289	0.01463	0.015417	0.013356		0.0330473	0.020288		0.0282993	0.0144677
H4_4_17 K12acK16ac		0.042793	0.044661	0.03619	0.044327	0.037295	0.039392		0.040976	0.0404	0.038085	0.040548	0.039214	0.038129		0.0412147	0.040338		0.0398203	0.039297
H4_4_17 K5acK8acK12ac		0.001927	0.00368	0.003252	0.003919	0.002739	0.003256		0.005162	0.004943	0.004178	0.006664	0.005514	0.005564		0.002953	0.00330467		0.004761	0.005914
H4_4_17 K5acK8acK16ac		0.00616	0.003416	0.002047	0	0.000695	0.000381		0.003805	0.003724	0.002747	0.001173	0.000901	0.001065		0.00387433	0.000358667		0.00342533	0.00104633
H4_4_17 K5acK12acK16ac		0.005602	0.005707	0.004009	0.018489	0.013975	0.01701		0.004239	0.002032	0.003086	0.014175	0.013735	0.014056		0.005106	0.0164913		0.003119	0.0139887
H4_4_17 K8acK12acK16ac		0.013778	0.012621	0.010038	0.008407	0.006417	0.007775		0.011581	0.012121	0.008681	0.010298	0.00823	0.008324		0.0121457	0.007533		0.0107943	0.00895067
H4_4_17 K5acK8acK12acK16ac		0.009287	0.01461	0.007358	0.006125	0.004351	0.003156		0.007713	0.009032	0.00527	0.005177	0.003596	0.003932		0.0104183	0.004544		0.00733833	0.004235
H4_20_23 unmod		0.025262	0.012788	0.013538	0.113916	0.118478	0.094571		0.242828	0.294837	0.291784	0.310475	0.333251	0.304789		0.017196	0.108988		0.276483	0.316172
H4_20_23 K20me1		0.033661	0.027596	0.042118	0.202259	0.253069	0.20774		0.757172	0.705163	0.708216	0.689525	0.666749	0.695211		0.0344583	0.221023		0.723517	0.683828
H4_20_23 K20me2		0.856397	0.871805	0.866183	0.659551	0.601064	0.655421		0	0	0	0	0	0		0.864795	0.638679		0	0
H4_20_23 K20me3		0.08468	0.087361	0.078161	0.023932	0.026632	0.042268		0	0	0	0	0	0		0.0834007	0.030944		0	0
H4_20_23 K20ac		0	0.000451	0	0.000342	0.000756	0		0	0	0	0	0	0		0.000150333	0.000366		0	0
H4_40_45 unmod		1	0.994836	0.999515	0.993863	0.998668	0.992352		1	1	0.999973	0.999977	0.999957	1		0.998117	0.994961		0.999991	0.999978
H4_40_45 K44ac		0	0.005164	0.000485	0.006137	0.001332	0.007648		0	0	2.7e-05	2.3e-05	4.3e-05	0		0.001883	0.005039		9e-06	2.2e-05
H1_1_35 H11.SETAPVAQAASTATEKPAAAKKTKKPAKAAAPR		0	1	0	0.600908	1	0		0	0.309176	0.018755	0.014853	0.094051	0.005473		0.333333	0.533636		0.10931	0.0381257
H1_1_35 H12.SEAAPAAPAAAPPAEKAPAKKKAAKKPAGVR		0	0	1	0.399092	0	0		0	0.040491	0.057592	0.188281	0.39349	0.110781		0.333333	0.133031		0.0326943	0.230851
H1_1_35 H13.SETAPAAPAAPAPVEKTPVKKKAKKTGAAAGKR		0	0	0	0	0	0		0.258909	0.107739	0.191038	0.193204	0.104724	0.201946		0	0		0.185895	0.166625
H1_1_35 H14.SETAPAAPAAPAPAEKTPVKKKAR		0	0	0	0	0	0		0.486107	0.491673	0.673649	0.450188	0.321794	0.506772		0	0		0.550476	0.426251
H1_1_35 H15.SETAPAETAAPAPVEKSPAKKKTTKKAGAAKR		0	0	0	0	0	0		0.254985	0.050921	0.058966	0.153473	0.085941	0.175028		0	0		0.121624	0.138147
H1_54_81 H11.SGVSLAALKKSLAAAGYDVEKNNSR		0	0.011574	0	0	0	0.013625		0.016295	0.015562	0.020391	0.070066	0.033511	0.002759		0.003858	0.00454167		0.017416	0.0354453
H1_54_81 H1v234.SGVSLAALKKALAAAGYDVEKNNSR		0.962048	0.907079	0.982777	0.984292	0.965129	0.951559		0.681241	0.795445	0.678956	0.6048	0.337855	0.495029		0.950635	0.966993		0.718547	0.479228
H1_54_81 H15.GGVSLPALKKALAAGGYDVEKNNSR		0.037952	0.069773	0.017223	0.015708	0.034871	0.034816		0.302464	0.173322	0.2904	0.26542	0.605359	0.501132		0.0416493	0.028465		0.255395	0.457304
H1_54_81 H1T.AGMSLAALKKALAAAGYDVEKNNSR		0	0.011574	0	0	0	0		0	0.015671	0.010253	0.059714	0.023274	0.001081		0.003858	0		0.00864133	0.028023
H2A1_36_42 unmod		0.985396	0.996733	0.996952	0.993291	0.993724	0.990117		0.980906	0.995319	0.997327	0.991856	0.99073	0.991042		0.993027	0.992377		0.991184	0.991209
H2A1_36_42 K36ac		0.002274	0.000881	0.000369	0.000699	0.00068	0		0.00216	0.000501	9e-06	0.000272	3.6e-05	0.000536		0.00117467	0.000459667		0.00089	0.000281333
H2A1_36_42 Y39ac		0.01233	0.002386	0.002679	0.00601	0.005596	0.009883		0.016934	0.00418	0.002664	0.007872	0.009234	0.008422		0.00579833	0.007163		0.007926	0.00850933
H2A3_36_42 unmod		0.999282	0.997707	0.999807	0.992876	0.999118	1		0.999901	0.999892	0.999943	0.999704	0.999342	0.999939		0.998932	0.997331		0.999912	0.999662
H2A3_36_42 K36ac		0	0	0.000193	0.000861	0	0		9.9e-05	0.000101	5.7e-05	0.000106	7.8e-05	5.3e-05		6.43333e-05	0.000287		8.56667e-05	7.9e-05
H2A3_36_42 Y39ac		0.000718	0.002293	0	0.006262	0.000882	0		0	7e-06	0	0.00019	0.00058	9e-06		0.00100367	0.00238133		2.33333e-06	0.000259667
H2AX_36_42 unmod		1	1	0.984321	1	0.983064	0.970056		1	0.999863	0.999878	0.999543	0.998454	1		0.994774	0.984373		0.999914	0.999332
H2AX_36_42 K36ac		0	0	0.015679	0	0.016936	0.029944		0	0	0	0	0	0		0.00522633	0.0156267		0	0
H2AX_36_42 Y39ac		0	0	0	0	0	0		0	0.000137	0.000122	0.000457	0.001546	0		0	0		8.63333e-05	0.000667667
H2A1_4_11 unmod		0.913999	0.924213	0.913453	0.962733	0.961364	0.961721		0.882268	0.862705	0.888919	0.927533	0.953152	0.949313		0.917222	0.961939		0.877964	0.943333
H2A1_4_11 K5ac		0.057311	0.049099	0.06199	0.025994	0.030622	0.030476		0.068922	0.068432	0.070904	0.034908	0.032953	0.036031		0.0561333	0.0290307		0.0694193	0.0346307
H2A1_4_11 K9ac		0.018089	0.015963	0.017903	0.003432	0.003991	0.003313		0.021285	0.018925	0.021076	0.005552	0.004346	0.004855		0.0173183	0.00357867		0.0204287	0.00491767
H2A1_4_11 K5acK9ac		0.005234	0.002039	0.002351	0.000765	0.00158	0.00196		0.003001	0.0034	0.002918	0.000641	0.00052	0.000708		0.003208	0.001435		0.00310633	0.000623
H2A1_4_11 K9me1		0.002268	0.003968	0.001604	0.003322	0.000926	0.001167		0.009371	0.019161	0.007029	0.010313	0.002487	0.002397		0.00261333	0.001805		0.0118537	0.00506567
H2A1_4_11 K5me1		0.003101	0.004719	0.002699	0.003754	0.001516	0.001363		0.015153	0.027377	0.009154	0.021053	0.006543	0.006696		0.00350633	0.002211		0.017228	0.0114307
H2AJ_4_11 unmod		0.142153	0.16522	0.109518	0.106607	0.036592	0.037525		0.042147	0.003804	0.004408	0.020433	0.00309	0.003076		0.138964	0.0602413		0.0167863	0.00886633
H2AJ_4_11 K5ac		0.013604	0.034549	0.010991	0.022188	0.003656	0.003209		2.3e-05	0.00035	0.000384	7.5e-05	2.4e-05	1e-05		0.0197147	0.00968433		0.000252333	3.63333e-05
H2AJ_4_11 K9ac		0.001925	0.003085	0.001431	0.00255	0.000866	0.001121		0.006557	0.000221	0.00027	0.001022	6.9e-05	7e-06		0.002147	0.00151233		0.00234933	0.000366
H2AJ_4_11 K5acK9ac		0.776061	0.718486	0.814746	0.739127	0.898691	0.92402		0.008349	0.899819	0.909358	4.1e-05	0.920625	0.947816		0.769764	0.853946		0.605842	0.622827
H2AJ_4_11 K9me1		0.040245	0.052477	0.04867	0.099444	0.045909	0.021765		0.666011	0.065767	0.060121	0.688015	0.053928	0.035072		0.0471307	0.055706		0.263966	0.259005
H2AJ_4_11 K5me1		0.026013	0.026182	0.014645	0.030084	0.014285	0.012359		0.276913	0.030038	0.025459	0.290415	0.022264	0.01402		0.02228	0.0189093		0.110803	0.1089
H2AX_4_11 unmod		0.713458	0.51651	0.744952	0.838154	0.816076	0.886852		0.674726	0.6024	0.633714	0.730993	0.878785	0.900671		0.658307	0.847027		0.636947	0.836816
H2AX_4_11 K5ac		0.058533	0.048936	0.054932	0.032778	0.052165	0.035279		0.043518	0.041439	0.044108	0.018697	0.020828	0.022254		0.0541337	0.040074		0.0430217	0.020593
H2AX_4_11 K9ac		0.038232	0.03858	0.04186	0.035051	0.075101	0.035412		0.025044	0.022713	0.024848	0.004735	0.006431	0.007022		0.0395573	0.0485213		0.0242017	0.00606267
H2AX_4_11 K5acK9ac		0	0	0	0	0	0		0.045647	0.037029	0.016737	0.004503	0.002863	0.010692		0	0		0.0331377	0.00601933
H2AX_4_11 K9me1		0.055119	0.15627	0.047835	0.021215	0.009324	0.008586		0.124746	0.180438	0.106459	0.134083	0.027084	0.033978		0.086408	0.0130417		0.137214	0.0650483
H2AX_4_11 K5me1		0.134658	0.239704	0.110421	0.072801	0.047334	0.033871		0.086319	0.11598	0.174134	0.106988	0.064009	0.025383		0.161594	0.0513353		0.125478	0.06546
H2AV_1_19 unmod		0.475867	0.00706	0.138946	0.340462	0.161905	0.776342		0.973545	1	0.988226	0.920777	0.9008	0.912106		0.207291	0.426236		0.987257	0.911228
H2AV_1_19 K4ac		0.052944	0.006076	0	0	0	0		0.008379	0	0.005271	0.0008	0.044036	0.027188		0.0196733	0		0.00455	0.024008
H2AV_1_19 K15ac		0.002946	0.000351	0	0	0	0		0.009306	0	0.005085	0.000606	0.050536	0.024997		0.001099	0		0.004797	0.0253797
H2AV_1_19 K4acK7ac		0	0	0.192248	0	0	0.02792		0.000381	0	0	0.031743	0.003383	0		0.0640827	0.00930667		0.000127	0.0117087
H2AV_1_19 K4acK11ac		0	0	0	0.049758	0	0		0	0	0	0.006167	0	0		0	0.016586		0	0.00205567
H2AV_1_19 K4acK15ac		0.17451	0	0	0.345986	0.409508	0.017296		0	0	0	0.00257	0	0		0.05817	0.257597		0	0.000856667
H2AV_1_19 K7acK11ac		0	0.058704	0	0	0	0		6.6e-05	0	0	0.001808	0	0		0.019568	0		2.2e-05	0.000602667
H2AV_1_19 K7acK15ac		0	0	0.068636	0	0	0		0.000153	0	0	0.002643	0.00049	0		0.0228787	0		5.1e-05	0.00104433
H2AV_1_19 K11acK15ac		0.234383	0.914832	0.143152	0.123259	0.275211	0.076715		0.000201	0	0	0.030379	0.000755	0		0.430789	0.158395		6.7e-05	0.010378
H2AV_1_19 K7acK11acK15ac		0	0.006269	0.076175	0	0	0		0	0	0	0.000765	0	0		0.0274813	0		0	0.000255
H2AV_1_19 K4acK11acK15ac		0	0.00293	0.054523	0	0	0		0	0	0	0	0	0		0.019151	0		0	0
H2AV_1_19 K4acK7acK15ac		0	0.001642	0	0	0	0		0	0	0	0.000844	0	0		0.000547333	0		0	0.000281333
H2AV_1_19 K4acK7acK11ac		0	0.002136	0.025317	0	0	0		0	0	0	0.000763	0	0		0.009151	0		0	0.000254333
H2AV_1_19 K4acK7acK11acK15ac		0.05935	0	0.301002	0.140536	0.153377	0.101727		0	0	0	0	0	0		0.120117	0.13188		0	0
H2AZ_1_19 unmod		0.534912	0.299691	0.463458	0.107066	0.351745	0.320594		0.816428	0.762815	0.740323	0.532262	0.441	0.583284		0.432687	0.259802		0.773189	0.518849
H2AZ_1_19 K4ac		0.021965	0.011921	0.019799	0.01194	0.003006	0.017799		0.085232	0.123016	0.134816	0.231112	0.303942	0.21371		0.017895	0.010915		0.114355	0.249588
H2AZ_1_19 K7ac		0	0.028268	0.070597	0	0.006367	0		0.005525	0.004318	0.003791	0.005029	0.004342	0.010897		0.032955	0.00212233		0.00454467	0.006756
H2AZ_1_19 K11ac		0	0.005976	0	0.073768	0	0.013614		0.007449	0.002669	0.0032	0.010258	0.008009	0.005465		0.001992	0.0291273		0.00443933	0.00791067
H2AZ_1_19 K15ac		0.052966	0.029735	0.194146	0.176163	0.056058	0.169967		0.085366	0.107182	0.117808	0.221339	0.2415	0.186644		0.0922823	0.134063		0.103452	0.216494
H2AZ_1_19 K4acK7ac		0.192216	0.262171	0.084078	0.03298	0.035814	0		0	0	0	0	0	0		0.179488	0.0229313		0	0
H2AZ_1_19 K4acK11ac		0.012291	0.091682	0	0.004237	0.007359	0		0	0	0	0	0	0		0.0346577	0.00386533		0	0
H2AZ_1_19 K4acK15ac		0.04338	0.056781	0.003852	0.11021	0.014243	0.386825		0	0	0	0	0	0		0.034671	0.170426		0	0
H2AZ_1_19 K7acK15ac		0.065669	0	0.022531	0.011417	0	0.062252		0	0	0	0	0	0		0.0294	0.0245563		0	0
H2AZ_1_19 K11acK15ac		0	0.213776	0.050393	0.055165	0.07041	0		0	0	0	0	0	0		0.0880563	0.0418583		0	0
H2AZ_1_19 K7acK11acK15ac		0.012589	0	0.013094	0.047399	0.044935	0.005219		0	0	0	0	0	0		0.008561	0.0325177		0	0
H2AZ_1_19 K4acK11acK15ac		0.018202	0	0.007656	0.093463	0.209039	0.003021		0	0	0	0	0	0		0.00861933	0.101841		0	0
H2AZ_1_19 K4acK7acK15ac		0.017767	0	0.053014	0.049705	0.096224	0.014091		0	0	0	0	0	0		0.0235937	0.05334		0	0
H2AZ_1_19 K4acK7acK11ac		0.028043	0	0.017382	0.068113	0.104799	0.006618		0	0	0	0	0	0		0.0151417	0.0598433		0	0
H2AZ_1_19 K4acK7acK11acK15ac		0	0	0	0.158373	0	0		0	0	6.2e-05	0	0.001207	0		0	0.052791		2.06667e-05	0.000402333
H2A1_12_17 unmod		0.62432	0.587225	0.606357	0.567434	0.586212	0.561237		0.686699	0.661218	0.665102	0.637218	0.631466	0.631363		0.605967	0.571628		0.671006	0.633349
H2A1_12_17 K13ac		0.001054	0.000887	0.000591	0.000541	0.000361	0.000324		0.002371	0.003375	0.001531	0.00308	0.00119	0.001399		0.000844	0.000408667		0.00242567	0.00188967
H2A1_12_17 K15ac		0.339405	0.36306	0.361335	0.387003	0.387031	0.410485		0.304171	0.334298	0.3219	0.347056	0.353086	0.358696		0.3546	0.39484		0.320123	0.352946
H2A1_12_17 K15me1		0.006365	0.017337	0.005212	0.008372	0.00295	0.006035		6.3e-05	0.000405	0.000259	2.5e-05	9.1e-05	2.5e-05		0.009638	0.00578567		0.000242333	4.7e-05
H2A1_12_17 K13me1		0.003471	0.004203	0.001531	0.002753	0.002207	0.004002		0.000117	0.000607	0.000258	7.6e-05	0.000139	6.8e-05		0.00306833	0.00298733		0.000327333	9.43333e-05
H2A1_12_17 T16ac		0.025385	0.027288	0.024974	0.033897	0.021239	0.017918		0.006578	9.7e-05	0.01095	0.012545	0.014028	0.008447		0.0258823	0.0243513		0.005875	0.0116733
H2A3_12_17 unmod		0.226863	0.235485	0.229185	0.252823	0.246728	0.263142		0.305573	0.316105	0.30504	0.351935	0.346407	0.341492		0.230511	0.254231		0.308906	0.346611
H2A3_12_17 K13ac		0.001627	0.001007	0.000681	0.00212	0.003287	0.001055		0.000804	7.7e-05	0.000225	9.1e-05	8.7e-05	0.000238		0.001105	0.002154		0.000368667	0.000138667
H2A3_12_17 K15ac		0.002961	0.001747	0.000943	0.002473	0.001808	0.000922		0.002048	8.6e-05	0.000366	0.000107	0.000102	0.000546		0.00188367	0.00173433		0.000833333	0.000251667
H2A3_12_17 K15me1		0.38375	0.380881	0.384596	0.370696	0.373703	0.367156		0.688197	0.678231	0.692064	0.644521	0.651589	0.655823		0.383076	0.370518		0.686164	0.650644
H2A3_12_17 K13me1		0.38375	0.380881	0.384596	0.370696	0.373703	0.367156		0.003377	0.005501	0.002306	0.003346	0.001801	0.001902		0.383076	0.370518		0.003728	0.00234967
H2A3_12_17 S16ac		0.001049	0	0	0.001193	0.000771	0.000569		0	0	0	0	1.4e-05	0		0.000349667	0.000844333		0	4.66667e-06
H2A1_72_77 unmod		0.987241	0.981355	0.998883	0.994951	0.999023	0.997122		0.999489	0.998732	0.99969	0.997775	0.999931	0.998182		0.98916	0.997032		0.999304	0.998629
H2A1_72_77 K74ac		0.012759	0.018645	0.001117	0.005049	0.000977	0.002878		0.000511	0.001268	0.00031	0.002225	6.9e-05	0.001818		0.0108403	0.002968		0.000696333	0.00137067
H2A_1_88 H2A14s.HLQLAIR		0.890444	0.978025	0.96426	0.958047	0.888608	0.551065		0.862592	0.969457	0.953892	0.932278	0.893124	0.542073		0.944243	0.79924		0.928647	0.789158
H2A_1_88 H2AX.GKTGGKAR		0.109556	0.021975	0.03574	0.041953	0.111392	0.448935		0.096094	0.024499	0.037918	0.06201	0.101106	0.402039		0.055757	0.20076		0.052837	0.188385
H2B_1_29 1C.PEPAKSAPAPKKGSKKAVTKAQKKDGKKR		0.510622	0	0.265261	0.184054	0.348394	0.067594		0.113006	0.166225	0.400298	0.110846	0.418686	0.326947		0.258628	0.200014		0.22651	0.285493
H2B_1_29 1H.PEPAKSAPAPKKGSKKALTKAQKKDGKKR		0	0	0	0	0	0		0.038916	0.06023	0.167397	0.028383	0.035704	0.030178		0	0		0.0888477	0.0314217
H2B_1_29 2B.PDPAKSAPAPKKGSKKAVTKVQKKDGKKR		0	0	0	0	0	0		0.038916	0.0597	0.174553	0.025887	0.08828	0.012434		0	0		0.0910563	0.0422003
H2B_1_29 1B.PEPSKSAPAPKKGSKKAISKAQKKDGKKR		0	0.283664	0	0.316595	0.097028	0		0.008587	0.001615	0.003826	0.007516	0.00852	0.019686		0.0945547	0.137874		0.004676	0.0119073
H2B_1_29 3B.PDPSKSAPAPKKGSKKAVTKAQKKDGKKR		0.489378	0.432672	0.158685	0.182755	0.457551	0.249309		0	0	0	0	0	0		0.360245	0.296538		0	0
H2B_1_29 1M.PEPTKSAPAPKKGSKKAVTKAQKKDGKKR		0	0	0.576054	0	0	0.404809		0	0	0	0.004334	0.02162	0		0.192018	0.134936		0	0.00865133
H2B_1_29 1P.PEPVKSVPAPKKGSKKAVTKAQKKDGKKR		0	0	0	0	0	0.050923		0.800575	0.68077	0.119054	0.771434	0.358806	0.535495		0	0.0169743		0.533466	0.555245
H2B_1_29 2E.PELAKSAPAPKKGSKKAVTKAQKKDGKKR		0	0.283664	0	0.316595	0.097028	0.227365		0	0.03146	0.134873	0.051599	0.068384	0.07526		0.0945547	0.213663		0.0554443	0.065081
