# Supplementary material for: One minute analysis of 200 histone posttranslational modifications by direct injection mass spectrometry
Source: HighWire-hosted journal article supplement (doi:10.1101/gr.247353.118), 2019-05-23
Supplement: Supplemental_Table_5.xlsx [file Supplemental_Table_5.xlsx]

## Sheet: Single marks
Supplemental Table 5: Deconvoluted single marks quantified with the three acquisition methods. The abundance of the single histone marks from histone H3 and H4 were obtained by summing the relative abundances of all peptides carrying the given marks (from Supplemental Table 4).
Single marks	MSX	Brain rep-1	Brain rep-2	Brain rep-3	Liver rep-1	Liver rep-2	Liver rep-3	Full MS windows	Brain rep-1	Brain rep-2	Brain rep-3	Liver rep-1	Liver rep-2	Liver rep-3	LC-MS	Brain rep-1	Brain rep-2	Brain rep-3	Liver rep-1	Liver rep-2	Liver rep-3
H3K4me1		0.048602	0.066428	0.050314	0.030864	0.02204	0.023097		0.060831	0.070463	0.059097	0.040543	0.036136	0.028289		0.060109	0.059669	0.06444	0.031093	0.035965	0.03394
H3K4me2		0.003644	0.004007	0.00406	0.004187	0.004679	0.004558		0.003908	0.005749	0.004727	0.00507	0.003527	0.003102		0.000402	1e-05	1.3e-05	2e-06	8e-06	1.1e-05
H3K4me3		0.005512	0.026647	0.00283	0.001404	0.000734	0.001531		0.006056	0.030251	0.005803	0.001934	0.000958	0.000816		0	0	0	0	0	0
H3K4ac		0.00112	0.002835	0.000881	0	0.000399	0.000558		0.000801	0.00142	0.000678	0.00041	0.0003	0.000839		0	0.001231	0.00099	0	0.000298	0
H3K9me1		0.161208	0.164533	0.189639	0.155152	0.133725	0.133005		0.227818	0.258151	0.241318	0.203065	0.181033	0.171415		0.147675	0.133668	0.16001	0.119264	0.143144	0.123021
H3K9me2		0.299839	0.274622	0.231667	0.165746	0.179664	0.176321		0.260849	0.256863	0.227796	0.199327	0.174441	0.166356		0.378945	0.389825	0.355139	0.289998	0.263526	0.277543
H3K9me3		0.255242	0.258536	0.241764	0.150628	0.174717	0.150363		0.222692	0.225849	0.223407	0.136115	0.148891	0.142103		0.230967	0.246441	0.227707	0.171045	0.157733	0.17614
H3K9ac		0.064495	0.068867	0.058964	0.044173	0.037939	0.044112		0.059677	0.054586	0.057046	0.038107	0.041054	0.043299		0.068217	0.048707	0.037962	0.044598	0.028277	0.04178
H3S10ph		0.006691	0.012455	0.002653	0.009869	0.008035	0.003495		0.008212	0.060145	0.011684	0.034321	0.006527	0.002696		0	0	0	0	0	0
H3K14ac		0.526631	0.535895	0.47774	0.395216	0.360165	0.40913		0.492774	0.484691	0.462327	0.395076	0.354677	0.392929		0.419958	0.4769	0.427759	0.341957	0.320016	0.320446
H3K18me1		0.005635	0.006589	0.003951	0.002842	0.002678	0.003319		0.003077	0.003743	0.002711	0.003314	0.001621	0.002376		0.005166	0.005677	0.005454	0.002878	0.002825	0.002917
H3K18ac		0.100518	0.108776	0.098977	0.060879	0.056463	0.063337		0.113413	0.119494	0.098401	0.065822	0.059877	0.067336		0.102323	0.104654	0.098208	0.064719	0.061014	0.066027
H3K23me1		0.004217	0.004771	0.002145	0.001624	0.0016	0.002203		0.001336	0.001832	0.000829	0.001399	0.000641	0.001187		0.005204	0.00162	0.000889	0.000456	0.000389	0.000317
H3K23ac		0.25959	0.289245	0.275658	0.182569	0.166224	0.17695		0.298128	0.310264	0.269549	0.195589	0.181162	0.194876		0.273709	0.281138	0.270278	0.192992	0.168838	0.191625
H31K27me1		0.273453	0.394896	0.278662	0.223842	0.230794	0.226686		0.233051	0.379259	0.310239	0.206534	0.213755	0.22		0.244843	0.258108	0.288967	0.229876	0.261524	0.220585
H31K27me2		0.420698	0.328934	0.38727	0.310776	0.255984	0.238701		0.453161	0.326326	0.384021	0.2974	0.295511	0.277073		0.502706	0.501341	0.454017	0.269867	0.260809	0.256227
H31K27me3		0.061186	0.051918	0.067695	0.026655	0.021701	0.026798		0.060463	0.05006	0.061074	0.024125	0.017405	0.016728		0.058045	0.056511	0.050563	0.030318	0.028818	0.026977
H31K27ac		0.008877	0.005609	0	0.00449	0.00529	0.004073		0.008093	0	0	0.008614	0.004344	0.013858		0	0.000627	0.000755	0.005682	0.005652	0.003332
H31K36me1		0.162735	0.213786	0.170998	0.094185	0.106193	0.090899		0.171866	0.200471	0.217469	0.090718	0.087477	0.083291		0.151475	0.145174	0.175752	0.101982	0.090935	0.124613
H31K36me2		0.40569	0.3456	0.404117	0.096037	0.057396	0.060978		0.42252	0.343654	0.377197	0.087637	0.065137	0.058928		0.600208	0.601952	0.551309	0.140878	0.123057	0.130837
H31K36me3		0.070569	0.029973	0.057611	0.02766	0.032048	0.03662		0.074552	0.03527	0.058025	0.018381	0.02367	0.022698		0.050788	0.042857	0.044551	0.028995	0.028106	0.03133
H33K27me1		0.105014	0.107635	0.197232	0.131196	0.15249	0.165966		0.132047	0.128147	0.166468	0.127665	0.150982	0.121656		0.270825	0.278526	0.304203	0.240408	0.263596	0.213364
H33K27me2		0.439414	0.277102	0.25753	0.226638	0.181581	0.245508		0.398579	0.286409	0.247203	0.203378	0.171472	0.259759		0.486845	0.484702	0.440577	0.313088	0.281781	0.246094
H33K27me3		0.188807	0.370637	0.322419	0.378874	0.352114	0.262313		0.286176	0.398021	0.357678	0.387383	0.371178	0.309017		0.066127	0.066835	0.062393	0.043973	0.046054	0.050578
H33K27ac		0.185817	0.131311	0.107543	0.061247	0.111546	0.190301		0.110064	0.083306	0.114475	0.061197	0.094917	0.186967		0	0.007868	0.00895	0.015352	0.016917	0
H33K36me1		0.115479	0.153065	0.203524	0.117016	0.107319	0.155302		0.177564	0.144671	0.158261	0.117853	0.105678	0.115947		0.14565	0.143012	0.17106	0.15673	0.140668	0.093247
H33K36me2		0.484321	0.516347	0.43766	0.379456	0.329337	0.27709		0.511309	0.530029	0.478618	0.370174	0.348692	0.359102		0.672384	0.673084	0.613727	0.240705	0.206229	0.198789
H33K36me3		0.042211	0.055821	0.106758	0.26915	0.300048	0.177364		0.041943	0.083766	0.128223	0.280932	0.296585	0.181799		0.061388	0.054456	0.055669	0.058198	0.049565	0.018448
H3K56me1		0.094984	0.021769	0.021257	0.003286	0.025117	0.010162		0.065912	0.030407	0.032128	0.005832	0.016174	0.010248		0	8e-06	0	0	0	0
H3K56me2		0.031684	0.011297	0.009457	0.004821	0	0.015555		0.027383	0.010689	0.006128	0.004623	0.001845	0.01056		0	0	1e-05	0	0	0
H3K56me3		0.022241	0.008443	0.009068	0.006893	0.014704	0.009258		0.020569	0.005205	0.006457	0	0.003471	0.01007		9.2e-05	0	0	0.003926	5e-06	0.011581
H3K56ac		0.090852	0	0.015082	0.010455	0.017936	0.209515		0.080184	0	0	0	0.023829	0.182086		0.000254	0.000521	0.000144	0.000124	0	2.1e-05
H3K79me1		0.189182	0.212822	0.108714	0.103716	0.079531	0.131705		0.233495	0.281575	0.114131	0.155845	0.099595	0.162998		0.093743	0.077571	0.06814	0.042299	0.050416	0.065137
H3K79me2		0.054974	0.017739	0.026349	0.009301	0.016071	0.02422		0.02217	0.008059	0.009642	0.003793	0.004362	0.016819		0.027343	0.021689	0.015996	0.017434	0.014436	0.023061
H3K79me3		0.049089	0.005261	0.012849	0	0.00355	0		0	0.003253	0	0.004361	0.001692	0.046145		0	0.003972	0.002066	0	0	0
H3K79ac		0	0.012037	0.004136	0.003874	0.00382	0.047199		0.032138	0.004278	0.001681	0.003913	0.005731	0.033329		0	2.4e-05	0	1.7e-05	2.3e-05	0
H3K122ac		0.004567	0.002905	0.001404	0.002482	0.009336	0.008544		0	0.000675	0.000999	0.000478	0.000343	0.001227		7.5e-05	0.000343	0.000255	0.000555	0.000628	0
H4K5ac		0.051718	0.059548	0.040242	0.106368	0.091287	0.098063		0.045002	0.042292	0.040082	0.098592	0.078594	0.08553		0.061909	0.057579	0.051352	0.114299	0.104335	0.110313
H4K8ac		0.082021	0.083801	0.065943	0.060719	0.052091	0.056728		0.0721	0.06811	0.058051	0.055719	0.050532	0.051771		0.086746	0.083875	0.076451	0.076023	0.072679	0.066435
H4K12ac		0.079042	0.095935	0.07698	0.165007	0.131098	0.144985		0.067604	0.063983	0.063122	0.136744	0.11834	0.118103		0.104445	0.105346	0.096612	0.174246	0.163618	0.161588
H4K16ac		0.591422	0.598475	0.579746	0.337955	0.32123	0.358285		0.592917	0.575459	0.559752	0.355912	0.320097	0.334317		0.558659	0.548332	0.530552	0.334057	0.340344	0.332727
H4K20me1		0.033661	0.027596	0.042118	0.202259	0.253069	0.20774		0.044835	0.036081	0.05588	0.267382	0.288409	0.253699		0.757172	0.705163	0.708216	0.689525	0.666749	0.695211
H4K20me2		0.856397	0.871805	0.866183	0.659551	0.601064	0.655421		0.847382	0.854691	0.83397	0.587762	0.567697	0.599661		0	0	0	0	0	0
H4K20me3		0.08468	0.087361	0.078161	0.023932	0.026632	0.042268		0.088871	0.092014	0.086384	0.024351	0.024672	0.031216		0	0	0	0	0	0
H4K20ac		0	0.000451	0	0.000342	0.000756	0		0.001529	0.000875	0.000461	0.000914	0.00046	0.001371		0	0	0	0	0	0
